# Supplementary material for: Phylogenetic classification of bony fishes
Source: Springer Nature journal article supplement (doi:10.1186/s12862-017-0958-3), 2017-07-06

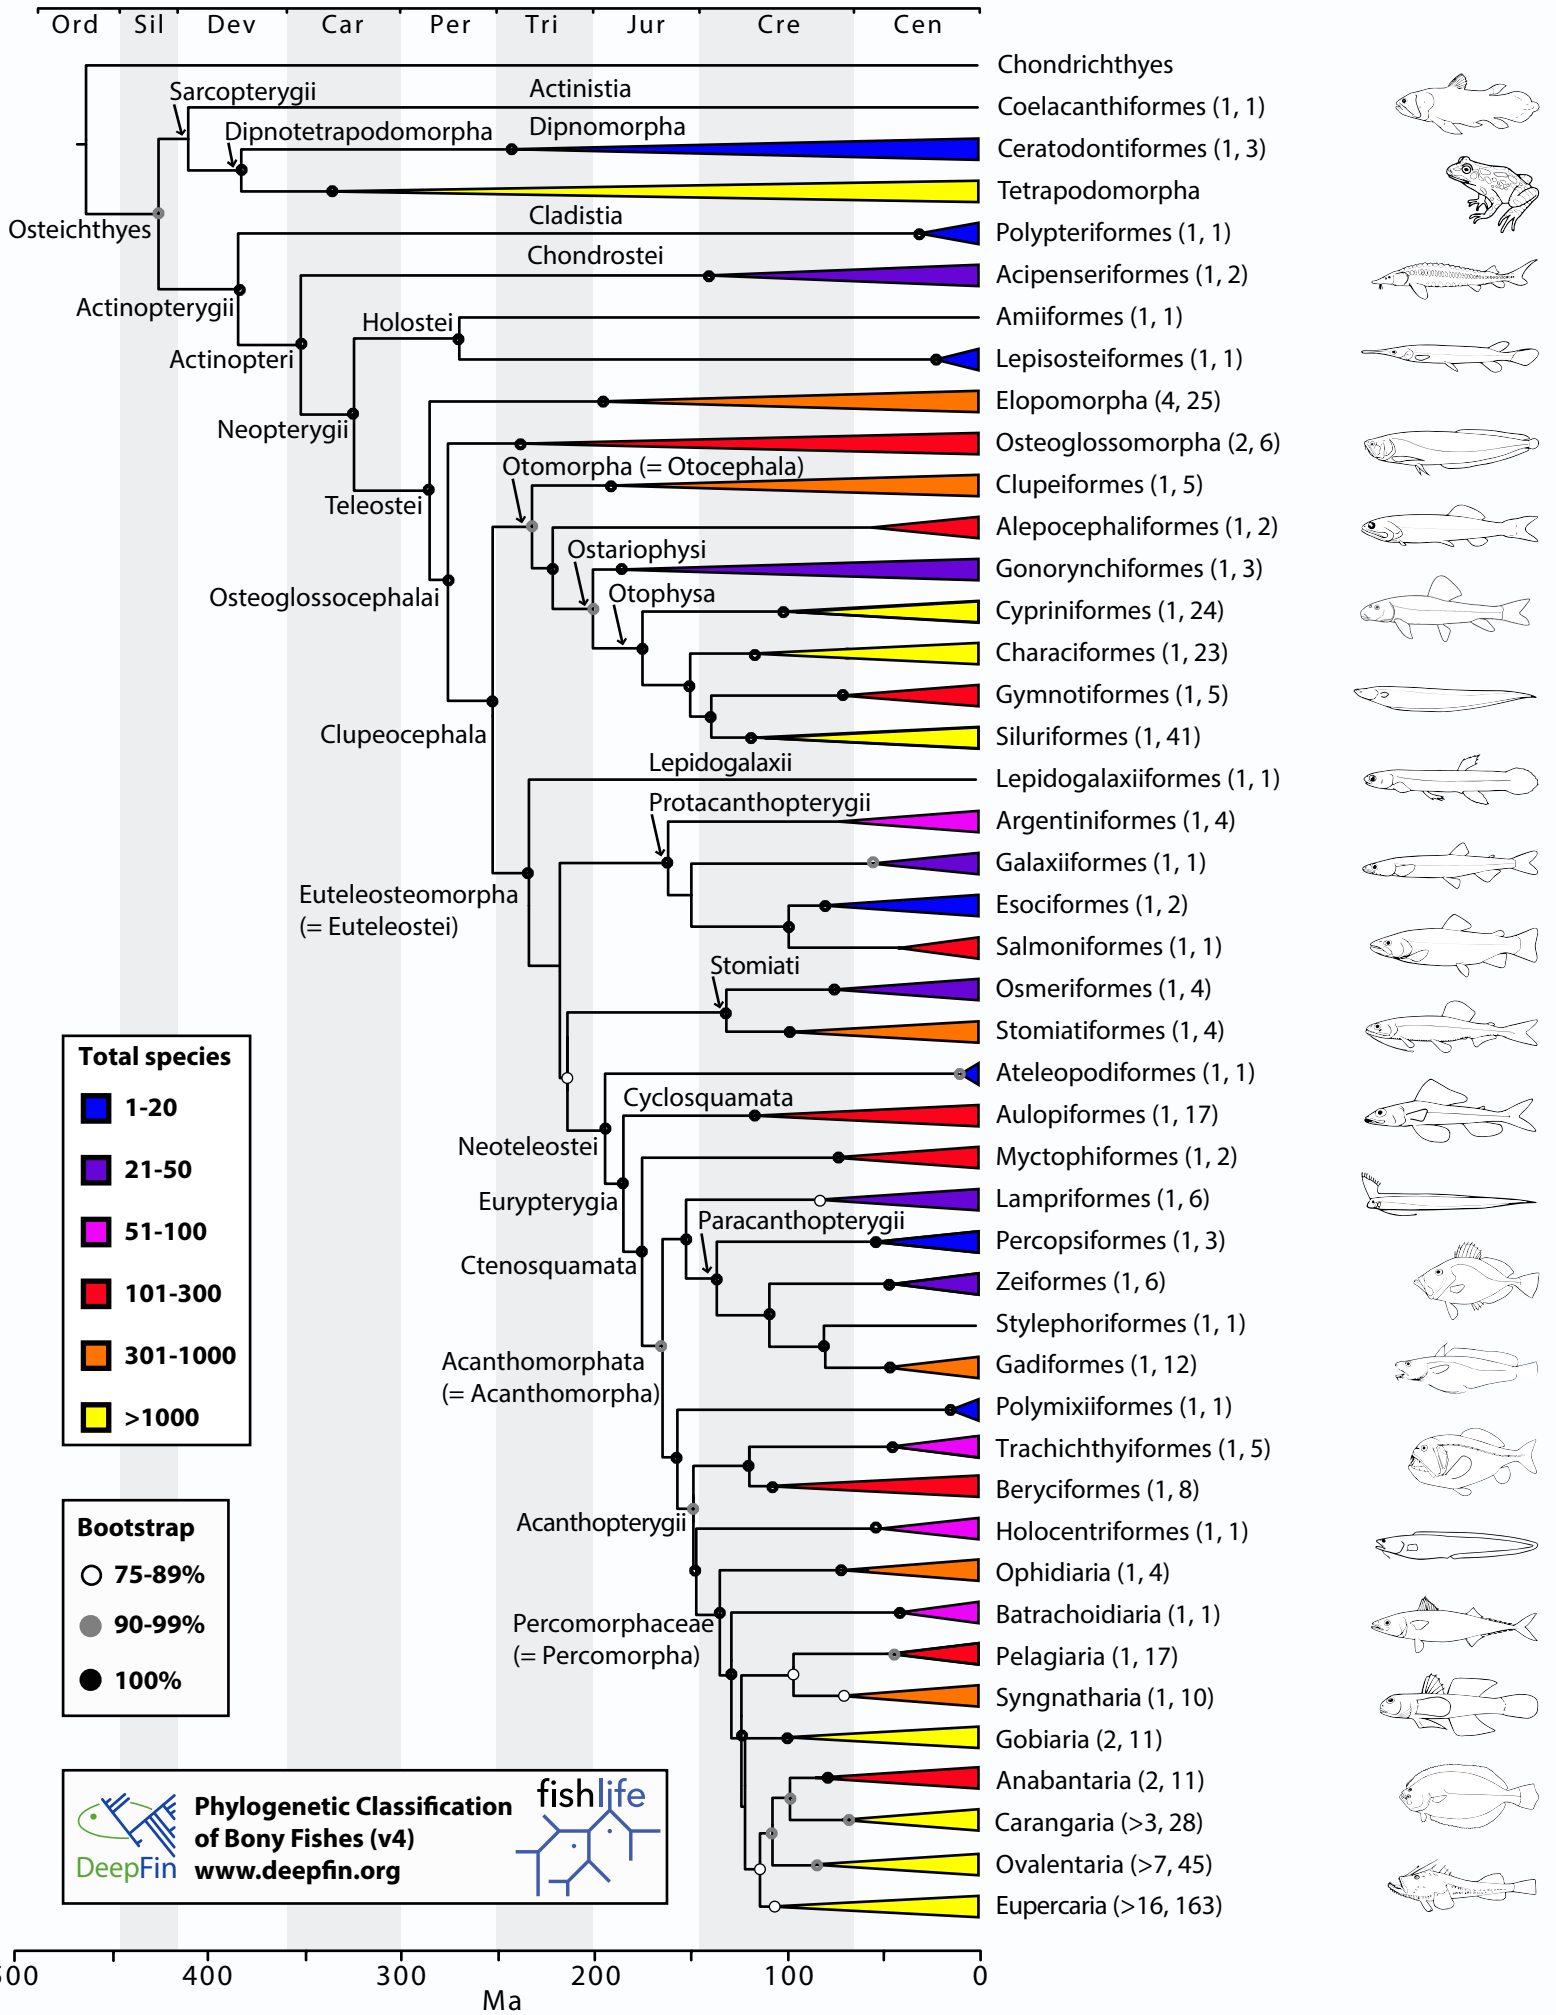

Supplement: 12862_2017_958_MOESM5_ESM.pdf [file 12862_2017_958_MOESM5_ESM.pdf]
