# Supplementary material for: Phylogenetic classification of bony fishes
Source: BMC Evol Biol. 2017 Jul 6;17:162. doi: 10.1186/s12862-017-0958-3 (PMC5501477; doi:10.1186/s12862-017-0958-3)
Supplement: Supplementary file 2 — Complete tree in newick format. See details under legend of Fig. 2. (TRE 125 kb) [file 12862_2017_958_MOESM2_ESM.tre]

((Rajidae_Leucoraja_erinacea_G01356:338,Callorhinchidae_Callorhinchus_milii_G01235:338)100:124.4,((Latimeriidae_Latimeria_chalumnae_G01347:409.4,((Neoceratodontidae_Neoceratodus_forsteri_G01534:241.804369,(Protopteridae_Protopterus_aethiopicus_annectens_G01451:103.2,Lepidosirenidae_Lepidosiren_paradoxa_G01352:103.2)100:138.604369)100:140.095631,(Pipidae_Xenopus_tropicalis_G01511:335.4,(Didelphidae_Monodelphis_domestica_G01378:129,(Muridae_Mus_musculus_G01382:71.12,Hominidae_Homo_sapiens_G01328:71.12)100:57.88)100:206.4)100:46.5)100:27.5)58:15.4,((Polypteridae_Erpetoichthys_calabaricus_G01288:29.2,(Polypteridae_Polypterus_senegalus_G01446:16.555114,Polypteridae_Polypterus_ornatipinnis_G01447:16.555114)100:12.644886)91:353.4,((Polyodontidae_Polyodon_spathula_G01445:138.9,(Acipenseridae_Acipenser_fulvescens_G01187:38.592824,(Acipenseridae_Scaphirhynchus_platorynchus_G01477:19.382705,Acipenseridae_Scaphirhynchus_albus_G01476:19.382705)100:19.210119)98:100.307176)100:211.2,((Amiidae_Amia_calva_E00461:267.9,((Lepisosteidae_Atractosteus_spatula_G01214:5.373563,Lepisosteidae_Atractosteus_tropicus_G01215:5.373563)100:16.241946,(Lepisosteidae_Lepisosteus_platostomus_G01353:5.131151,(Lepisosteidae_Lepisosteus_oculatus_G01354:3.197364,Lepisosteidae_Lepisosteus_osseus_E00993:3.197364)100:1.933787)98:16.484359)100:246.28449)100:54.6,(((Megalopidae_Megalops_atlanticus_G01372:133.591899,Elopidae_Elops_saurus_E00769:133.591899)100:62.608101,((Albulidae_Albula_glossodonta_G01192:40.548584,Albulidae_Albula_vulpes_E00501:40.548584)95:110.251416,((Notacanthidae_Notacanthus_chemnitzii_G01399:50.676944,(Halosauridae_Halosauropsis_macrochir_E00788:40.373486,Halosauridae_Aldrovandia_affinis_G01193:40.373486)100:10.303457)92:50.323056,(((Eurypharyngidae_Eurypharynx_pelecanoides_G01292:25.868725,Saccopharyngidae_Saccopharynx_ampullaceus_E01001:25.868725)99:44.324932,(Nemichthyidae_Nemichthys_scolopaceus_G01393:58.74446,Anguillidae_Anguilla_rostrata_G01202:58.74446)57:11.449197)100:9.198477,((Serrivomeridae_Serrivomer_beanii_G01487:53.005541,Muraenidae_Echidna_nebulosa_rhodochilus_G01281:53.005541)100:23.052738,(Congridae_Conger_oceanicus_G01261:65.421519,(Muraenesocidae_Muraenesox_cinereus_G01381:57.198765,(Ophichthidae_Myrichthys_maculosus_G01385:35.645271,Ophichthidae_Ophichthus_cephalozona_G01404:35.645271)62:21.553495)100:8.222754)100:10.63676)99:3.333855)99:21.607866)100:49.8)100:45.4)100:87.1,(((Hiodontidae_Hiodon_tergisus_G01325:9.532829,Hiodontidae_Hiodon_alosoides_E00990:9.532829)100:217.567171,(Pantodontidae_Pantodon_buchholzi_G01417:163.1,((Osteoglossidae_Osteoglossum_bicirrhosum_E00084:104.854708,(Osteoglossidae_Arapaima_gigas_G01206:78.3,Osteoglossidae_Heterotis_niloticus_G01324:78.3)100:26.554708)100:43.473236,((Mormyridae_Gnathonemus_petersii_G01301:78.30036,Gymnarchidae_Gymnarchus_niloticus_G01307:78.30036)100:41.99964,(Notopteridae_Xenomystus_nigri_G01510:81.631435,(Notopteridae_Chitala_chitala_G01252:1.219287,Notopteridae_Chitala_ornata_G01253:1.219287)100:80.412149)100:38.668565)100:28.027943)100:14.772057)48:64)100:46.7,(((Denticipitidae_Denticeps_clupeoides_G01274:188.9,(Clupeidae_Jenkinsia_lamprotaenia_G01339:105.3,(Chirocentridae_Chirocentrus_dorab_G01251:87.117111,((Engraulidae_Engraulis_mordax_eurystole_E00351:47.084648,Engraulidae_Coilia_nasus_G01260:47.084648)38:33.352669,((Pristigasteridae_Pellona_flavipinnis_G01425:27.465346,Pristigasteridae_Ilisha_elongata_G01338:27.465346)100:46.442845,(Clupeidae_Alosa_pseudoharengus_G01195:54.162777,Clupeidae_Dorosoma_cepedianum_E01016:54.162777)62:19.745413)100:6.529127)100:6.679793)55:18.182889)98:83.6)100:41.3,((Alepocephalidae_Talismania_bifurcata_E00359:53.278988,((Alepocephalidae_Bathylaco_nigricans_G01223:33.838039,(Alepocephalidae_Alepocephalus_tenebrosus_E00358:4.645069,Alepocephalidae_Alepocephalus_agassizii_G01194:4.645069)34:29.192969)100:10.957021,((Alepocephalidae_Rouleina_attrita_E00977:22.280783,Alepocephalidae_Xenodermichthys_copei_E00779:22.280783)100:19.919217,(Platytroctidae_Sagamichthys_abei_E00366:16.923695,(Platytroctidae_Searsia_koefoedi_G01481:16.870939,(Platytroctidae_Maulisia_microlepis_E00978:12.550045,Platytroctidae_Normichthys_operosus_E00971:12.550045)100:4.320894)88:0.052756)26:25.276305)100:2.59506)30:8.483928)37:166.419559,(((Gonorynchidae_Gonorynchus_abbreviatus_M17025:18.169743,(Gonorynchidae_Gonorynchus_greyi_G01306:2.712754,Gonorynchidae_Gonorynchus_forsteri_G01305:2.712754)100:15.456989)100:157.730257,(Chanidae_Chanos_chanos_E00345:147.1,(Kneriidae_Phractolaemus_ansorgii_M25171:99.074809,(Kneriidae_Parakneria_sp_G01419:30.990181,Kneriidae_Cromeria_nilotica_G01269:30.990181)100:68.084628)100:48.025191)100:28.8)100:22.7,((Gyrinocheilidae_Gyrinocheilus_aymonieri_I2728-AUF5008:99.3,((Catostomidae_Ictiobus_niger_I2706-187:32.76795664,((Catostomidae_Thoburnia_rhothoeca_I2703-183:11.13981672,Catostomidae_Thoburnia_atripinnis_I2702-182:11.13981672)NA:9.026250333,((Catostomidae_Erimyzon_oblongus_I2701-181:15.16130046,Catostomidae_Minytrema_melanops_I2704-184:15.16130046)NA:3.577140569,((Catostomidae_Catostomus_plebius_I2585-18:8.305248805,Catostomidae_Catostomus_platyrhynchus_I2575-AUF0183:8.305248805)NA:4.110092938,((Catostomidae_Catostomus_leopoldi_I2709-190:3.449440028,Catostomidae_Catostomus_cahita_I2586-17:3.449440028)NA:1.668114849,(Catostomidae_Catostomus_bernardini_I2603-15:3.940920017,Catostomidae_Catostomus_wigginsi_I2708-189:3.940920017)NA:1.17663486)NA:7.297786867)NA:6.323099282)NA:1.42762603)NA:12.60188958)NA:58.8457427,(((Botiidae_Yasuhikotakia_lecontei_I2576-JWA0285:23.07932267,Botiidae_Sinibotia_robusta_I2631-25:23.07932267)NA:45.76608767,(Vaillantellidae_Vaillantella_maassi_I2716-104:65.30809539,(((Cobitidae_Lepidocephalichthys_hasselti_I2618-111:32.99894027,Cobitidae_Pangio_anguillaris_I2600-48:32.99894027)NA:6.56411903,(Cobitidae_Acantopsis_sp_I2577-JWA0327:36.99533531,(Cobitidae_Cobitis_biwae_I2683-160:18.92254847,Cobitidae_Misgurnus_bipartitus_I2643-82:18.92254847)NA:18.07278683)NA:2.567723998)NA:20.21660633,((Balitoridae_Homaloptera_ogilvei_I2666-107:38.1538566,(Gastromyzontidae_Pseudogastromyzon_myersi_I2628-10:10.79341868,Gastromyzontidae_Beaufortia_kweichowensis_I2605-44:10.79341868)NA:27.36043792)NA:16.21407333,(Nemacheilidae_Lefua_echigonia_I2674-103:36.43237221,(Nemacheilidae_Schistura_fasciolata_I2662-94:33.58772566,(Nemacheilidae_Nemacheilus_corica_I2629-14:20.26424389,Nemacheilidae_Acanthocobitis_botia_I2718-54:20.26424389)NA:13.32348177)NA:2.844646555)NA:17.93555772)NA:5.411735702)NA:5.528429755)NA:3.537314953)NA:20.38282147,(Paedocyprididae_Paedocypris_sp_I2727-206:82.68841664,((((Cyprinidae_Schismatorhynchos_nukta_I2590-64:27.10433234,(Cyprinidae_Cirrhinus_microlepis_I2651-131:23.83744702,(Cyprinidae_Cirrhinus_cirrhosus_I2606-27:22.04298271,(Cyprinidae_Labeo_senegalensis_I2642-79:12.41149877,(Cyprinidae_Catla_catla_I2601-45:9.951342193,Cyprinidae_Labeo_rohita_I2658-138:9.951342193)NA:2.460156573)NA:9.631483945)NA:1.794464307)NA:3.266885317)NA:17.00826116,(((Cyprinidae_Akrokolioplax_bicornis_I2693-170:7.279055027,Cyprinidae_Crossocheilus_latius_I2625-5:7.279055027)NA:18.52717738,(Cyprinidae_Placocheilus_dulongensis_I2694-173:19.900728,(Cyprinidae_Garra_flavatra_I2607-32:16.44498608,(Cyprinidae_Garra_waterloti_I2609-89:6.915210904,Cyprinidae_Garra_rufa_I2637-60:6.915210904)NA:9.529775179)NA:3.455741913)NA:5.905504416)NA:11.3704486,((Cyprinidae_Crossocheilus_reticulatus_I2654-134:24.59392955,Cyprinidae_Lobocheilos_melanotaenia_I2667-140:24.59392955)NA:1.244925569,((Cyprinidae_Barbichthys_laevis_I2665-102:23.69399277,Cyprinidae_Henicorhynchus_siamensis_I2678-154:23.69399277)NA:1.581539908,(Cyprinidae_Osteochilus_hasseltii_I2671-144:22.53816542,Cyprinidae_Labiobarbus_lineatus_I2692-169:22.53816542)NA:2.737367261)NA:0.5633224419)NA:11.33782589)NA:6.935912483)NA:13.33764778,((Cyprinidae_Catlocarpio_siamensis_I2650-130:40.79354723,Cyprinidae_Probarbus_jullieni_I2672-145:40.79354723)NA:13.97080742,((Cyprinidae_Carassioides_acuminatus_I2592-57:27.62176889,Cyprinidae_Cyprinus_carpio_I2598-58:27.62176889)NA:19.89395383,((Cyprinidae_Chagunius_chagunio_I2591-46:40.5421107,(Cyprinidae_Spinibarbus_caldwelli_I2717-51:36.18415546,(Cyprinidae_Acrossocheilus_monticola_I2663-96:33.17052925,((Cyprinidae_Gymnodiptychus_integrigymnatus_I2660-171:29.77014867,(Cyprinidae_Schizothorax_dulongensis_I2695-174:25.23785356,Cyprinidae_Percocypris_retrodorsalis_I2673-172:25.23785356)NA:4.532295116)NA:1.148785787,((Cyprinidae_Tor_tambroides_I2719-52:11.19389408,Cyprinidae_Barbus_compiniei_I2614-41:11.19389408)NA:15.97182875,(Cyprinidae_Cyprinion_semiplotum_I2656-136:25.36794043,(Cyprinidae_Barbus_barbus_I2587-13:20.1944085,Cyprinidae_Capoeta_aculeata_I2615-105:20.1944085)NA:5.173531931)NA:1.797782397)NA:3.753211631)NA:2.251594791)NA:3.01362621)NA:4.357955243)NA:1.217184712,((Cyprinidae_Oreichthys_cosuatis_I2627-9:34.74802018,((Cyprinidae_Puntius_fasciatus_I2594-11:29.04241114,Cyprinidae_Puntius_filamentosus_I2645-125:29.04241114)NA:1.707165978,((Cyprinidae_Rohtee_ogilbii_I2688-165:28.52766151,Cyprinidae_Hampala_dispar_I2574-JWA0396:28.52766151)NA:1.771225416,(Cyprinidae_Puntius_sophore_I2713-49:27.71061381,Cyprinidae_Puntius_nigrofasciatus_I2646-126:27.71061381)NA:2.588273115)NA:0.4506901874)NA:3.998443068)NA:5.62536775,((Cyprinidae_Barbonymus_schwanenfeldii_I2619-114:29.50443672,(Cyprinidae_Cyclocheilichthys_enoplos_I2655-135:21.88001314,(Cyprinidae_Cosmochilus_harmandi_I2653-133:20.18684466,Cyprinidae_Amblyrhynchichthys_truncatus_I2649-129:20.18684466)NA:1.693168479)NA:7.624423573)NA:1.489654679,(Cyprinidae_Discherodontus_ashmeadi_I2636-31:27.73848064,((Cyprinidae_Sawbwa_resplendens_I2639-63:20.36748578,Cyprinidae_Poropuntius_normani_I2714-36:20.36748578)NA:4.654961071,(Cyprinidae_Barbonymus_gonionotus_I2622-120:20.22875377,Cyprinidae_Mystacoleucus_marginatus_I2670-143:20.22875377)NA:4.793693077)NA:2.71603379)NA:3.255610757)NA:9.37929654)NA:1.38590748)NA:5.756427308)NA:7.248631927)NA:2.685886623)NA:13.80177964,((Danionidae_Esomus_danricus_I2613-99:66.00981801,((Danionidae_Amblypharyngodon_mola_I2632-26:43.58269972,(Danionidae_Horadandia_atukorali_I2675-115:34.3216483,(Danionidae_Rasbora_pauciperforata_I2721-MTD031:22.5746796,(Danionidae_Rasbora_borapetensis_I2554-MTD027:15.80561258,Danionidae_Rasbora_rubrodorsalis_I2635-30:15.80561258)NA:6.769067015)NA:11.7469687)NA:9.261051425)NA:21.03467674,(((Danionidae_Opsarius_koratensis_I2638-61:3.251799279,Danionidae_Opsarius_koratensis_I2556-MTD030:3.251799279)NA:35.34405516,((Danionidae_Securicula_gora_I2680-157:19.55973936,Danionidae_Salmostoma_phulo_I2664-100:19.55973936)NA:16.49316585,((Danionidae_Barilius_tilio_I2553-MTD025:15.49241336,Danionidae_Barilius_pulchellus_I2710-191:15.49241336)NA:0.8385904916,(Danionidae_Raiamas_senegalensis_I2722-AUF5433:11.12891721,(Danionidae_Chelaethiops_bibie_I2677-153:9.967695001,(Danionidae_Opsaridium_ubangiense_I2551-MTD021:9.302293936,Danionidae_Leptocypris_niloticus_I2679-155:9.302293936)NA:0.6654010641)NA:1.161222205)NA:5.202086641)NA:19.72190136)NA:2.542949222)NA:24.03003604,((Danionidae_Danionella_mirifica_I2657-137:0.1630709293,Danionidae_Danionella_priapus_I2539-MTD007:0.1630709293)NA:57.2440699,((Danionidae_Danio_feegradei_I2633-28:23.66186499,(Danionidae_Danio_margaritatus_I2549-MTD017:20.08425696,(Danionidae_Danio_tinwini_I2550-MTD018:15.03286798,Danionidae_Danio_rerio_I9999-REFERENCE:15.03286798)NA:5.051388975)NA:3.577608036)NA:24.43355525,((Danionidae_Microrasbora_nana_I2620-117:3.523623877,Danionidae_Microdevario_kubotai_I2612-98:3.523623877)NA:29.25167093,((Danionidae_Microrasbora_rubescens_I2542-MTD010:21.7385715,(Danionidae_Devario_aequipinnatus_I2555-MTD029:17.19729187,Danionidae_Inlecypris_auropurpurea_I2626-7:17.19729187)NA:4.541279627)NA:9.346243866,(Danionidae_Chela_dadiburjori_I2682-159:26.66497363,(Danionidae_Chela_cachius_I2546-MTD014:22.66883953,(Danionidae_Laubuca_laubuca_I2543-MTD011:13.98737397,Danionidae_Chela_caeruleostigmata_I2634-29:13.98737397)NA:8.681465564)NA:3.996134095)NA:4.419841739)NA:1.690479444)NA:15.32012543)NA:9.311720582)NA:5.218749649)NA:1.991485986)NA:1.392441548)NA:4.420236323,(Sundadanidae_Sundadanio_axelrodi_I2621-118:68.18797995,((((Xenocyprididae_Zacco_sieboldii2_I2690-167:18.09867483,Xenocyprididae_Zacco_temmincki_I2691-168:18.09867483)NA:4.661618536,(Xenocyprididae_Opsariichthys_bidens_I2720-71:10.4814594,Xenocyprididae_Zacco_platypus_I2689-166:10.4814594)NA:12.27883397)NA:24.32822096,(((Xenocyprididae_Hemigrammocypris_rasborella_I2659-33:19.71875978,Xenocyprididae_Metzia_lineata_I2599-62:19.71875978)NA:22.05114665,(Xenocyprididae_Parachela_siamensis_I2630-24:35.14950719,(Xenocyprididae_Albulichthys_albuloides_I2648-128:9.444759873,Xenocyprididae_Nicholsicypris_normalis_I2644-124:9.444759873)NA:25.70474732)NA:6.620399235)NA:2.660002056,(Xenocyprididae_Paralaubuca_sp_I2611-92:39.27419882,((Xenocyprididae_Hypophthalmichthys_molitrix_I2588-69:26.5146402,(Xenocyprididae_Parabramis_pekinensis2_I2640-72:12.11701891,Xenocyprididae_Chanodichthys_erythropterus_I2617-110:12.11701891)NA:14.39762129)NA:6.827182232,(Xenocyprididae_Squaliobarbus_curriculus_I2641-76:27.59545616,(Xenocyprididae_Ctenopharyngodon_idella_I2596-66:25.99123527,Xenocyprididae_Elopichthys_bambusa_I2593-59:25.99123527)NA:1.604220883)NA:5.746366275)NA:5.932376388)NA:5.155709661)NA:2.658605845)NA:8.563610093,((Acheilognathidae_Acheilognathus_tonkinensis_I2578-CCS0001:51.23804935,(Gobionidae_Squalidus_chankaensissubsp_I2676-147:40.87724236,((Gobionidae_Abbottina_rivularis2_I2681-158:29.00425033,(Gobionidae_Romanogobio_albipinnatus_I2699-178:17.48280065,Gobionidae_Gobio_gobio_I2697-176:17.48280065)NA:11.52144968)NA:4.649198055,(Gobionidae_Rhinogobio_typus_I2604-73:32.88463712,((Gobionidae_Gnathopogon_strigatus_I2623-123:24.60535302,Gobionidae_Coreoleuciscus_splendidus_I2652-132:24.60535302)NA:5.570276253,(Gobionidae_Pseudorasbora_parva_I2686-163:19.81398821,Gobionidae_Pungtungia_herzi2_I2687-164:19.81398821)NA:10.36164106)NA:2.709007847)NA:0.7688112667)NA:7.223793976)NA:10.36080698)NA:1.750715191,(Tanichthyidae_Tanichthys_micagemmae_I2715-101:50.9317178,((Leuciscidae_Notemigonus_crysoleucas_I2566-CKR1213:24.11400469,(Leuciscidae_Leuciscus_leuciscus_I2698-177:22.26508368,((Leuciscidae_Alburnus_alburnus_I2696-175:9.048929011,Leuciscidae_Leuciscus_lepidus_I2616-106:9.048929011)NA:12.29115551,(Leuciscidae_Alburnoides_bipunctatus_I2624-2:20.06528539,Leuciscidae_Rutilus_rutilus_I2700-179:20.06528539)NA:1.274799133)NA:0.9249991563)NA:1.848921013)NA:7.964974182,((Leuciscidae_Phoxinus_phoxinus_I2602-35:30.33219555,(Leuciscidae_Oreoleuciscus_humilis_I2684-161:12.09063362,Leuciscidae_Phoxinus_oxycephalusjouyi_I2685-162:12.09063362)NA:18.24156193)NA:1.042053834,((Leuciscidae_Semotilus_atromaculatus_I2572-CKR0104:29.21098099,(Leuciscidae_Chrosomus_eos_I2558-CKR0646:22.48278605,(Leuciscidae_Ptychocheilus_oregonensis_I2583-AUF0202:8.430973542,(Leuciscidae_Gila_nigrescens_I2707-188:6.683455702,Leuciscidae_Acrocheilus_alutaceus_I2582-AUF0194:6.683455702)NA:1.74751784)NA:14.05181251)NA:6.72819494)NA:1.606137629,((Leuciscidae_Richardsonius_balteatus_I2581-AUF0166:13.67279806,Leuciscidae_Clinostomus_funduloides_I2584-MT0196:13.67279806)NA:11.06741552,((Leuciscidae_Rhinichthys_atratulus_I2571-CKR0174:18.65379817,Leuciscidae_Exoglossum_maxillingua_I2561-CKR0949:18.65379817)NA:3.227584899,((Leuciscidae_Nocomis_biguttatus_I2565-CKR0840:17.70142505,Leuciscidae_Campostoma_anomalum_I2557-CKR0263:17.70142505)NA:3.311928905,(Leuciscidae_Macrhybopsis_storeriana_I2564-AUF0007:16.61240761,((Leuciscidae_Phenacobius_catostomus_I2569-CKR1180:10.70521578,Leuciscidae_Erimystax_insignis_I2560-CKR1198:10.70521578)NA:5.187374157,((Leuciscidae_Notropis_amplamala_I2567-AUF0033:10.1398291,Leuciscidae_Luxilus_chrysocephalus_I2563-CKR0137:10.1398291)NA:1.782269372,(Leuciscidae_Lythrurus_bellus_I2573-AUF0593:11.40272006,((Leuciscidae_Hybognathus_hankinsoni_I2562-CKR0727:9.226000704,Leuciscidae_Notropis_longirostris_I2568-AUF0048:9.226000704)NA:0.9490508112,(Leuciscidae_Hybopsis_amplops_I2712-CKR1496:9.591590662,(Leuciscidae_Opsopoeodus_emiliae_I2705-185:8.459209744,(Leuciscidae_Cyprinella_callistia_I2559-CKR1162:7.757191629,(Leuciscidae_Pimephales_vigilax_I2570-CKR1190:6.441608816,Leuciscidae_Erimonax_monachus_I2711-NCSM61165:6.441608816)NA:1.315582813)NA:0.7020181151)NA:1.132380918)NA:0.5834608527)NA:1.227668541)NA:0.5193784175)NA:3.970491464)NA:0.7198176757)NA:4.400946341)NA:0.8680291103)NA:2.858830513)NA:6.076905042)NA:0.5571307596)NA:0.7047294934)NA:18.85273893)NA:2.057046735)NA:2.663359882)NA:12.53585553)NA:2.242074387)NA:0.8219665735)NA:11.43639574)NA:6.539815163)NA:2.385467534)NA:7.686300659)NA:73.59999999,((((Apteronotidae_Apternotus_sp_P1_H12_RG56:54.827604,(Apteronotidae_Apteronotus_albifrons_P1_C09_RG93:16.943377,Apteronotidae_Sternarchorhynchus_stewarti_P02_F01_RG28:16.943377)100:37.884227)99:34.562483,((Sternopygidae_Sternopygus_macrurus_P1_B11_RG05:69.895467,(Sternopygidae_Eigenmannia_virescens_P1_F12_RG66:31.360629,Sternopygidae_Rhabdolichops_jegui_P02_H05_RG15:31.360629)100:38.534838)95:6.620228,(Gymnotidae_Electrophorus_electricus_P1_E08_RG04:70.740802,((Hypopomidae_Brachyhypopomus_sp_P02_F02_RG78:39.77966,Hypopomidae_Brachyhypopomus_brevirostris_P1_F09_RG46:39.77966)100:17.976809,(Rhamphichthyidae_Hypopygus_lepturus_P02_C04_RG19:49.795753,(Rhamphichthyidae_Rhamphichthys_rostratus_P1_B12_RG75:39.697006,(Rhamphichthyidae_Gymnorhamphichthys_hypostomus_P1_D10_RG08:8.762387,Rhamphichthyidae_Gymnorhamphichthys_rondoni_P1_G09_RG41:8.762387)100:30.934618)100:10.098747)100:7.960716)100:12.984334)96:5.774893)98:12.874391)100:60.609913,(((Nematogenyidae_Nematogenys_inermis_P02_B05_RG90:105.980069,(Trichomycteridae_Ituglanis_amazonicus_P02_C01_RG65:71.190634,(Trichomycteridae_Trichomycteridae_sp_P1_G10_RG37:59.821777,(Trichomycteridae_Haemomaster_venezuelae_P1_A09_RG36:50.020985,((Trichomycteridae_Henonemus_sp_P1_H08_RG85:18.969064,Trichomycteridae_Pseudostegophilus_nemurus_P02_G04_RG10:18.969064)100:24.335183,(Trichomycteridae_Vandellia_jamesi_P1_F10_RG26:31.166535,Trichomycteridae_Paracanthapoma_parva_P1_G11_RG96:31.166535)100:12.137712)99:6.716738)96:9.800792)97:11.368857)100:34.789436)42:4.618203,(Callichthyidae_Callichthys_callichthys_P02_G05_RG69:103.131308,(Astroblepidae_Astroblepus_sp_P02_E04_RG21:80.490075,((Loricariidae_Harttia_platystoma_P02_F04_RG45:28.333034,(Loricariidae_Loricaria_sp_P02_C06_RG03:26.442633,(Loricariidae_Lamontichthys_filamentosus_P02_A02_RG27:21.150791,Loricariidae_Farlowella_amazona_P02_H08_RG85:21.150791)100:5.291842)48:1.8904)100:24.527449,(Loricariidae_Chaetostoma_breve_P1_B10_RG55:36.304623,((Loricariidae_Ancistrus_leucostictus_P1_G08_RG68:25.693536,Loricariidae_Lasiancistrus_schomburgkii_P1_F11_RG51:25.693536)96:6.181985,(Loricariidae_Pseudancistrus_nigrescens_P3_D06_RG17:31.121076,(Loricariidae_Acanthicus_adonis_P02_B10_RG55:28.032902,(Loricariidae_Hypostomus_taphorni_P02_B03_RG02:17.496545,Loricariidae_Peckoltia_lineola_P1_H09_RG83:17.496545)100:10.536357)87:3.088174)34:0.754445)94:4.429102)100:16.55586)100:27.629592)100:22.641233)90:7.466965)75:9.835053,(Diplomystidae_Diplomystes_nahuelbutaensis_P02_C05_RG81:106.242234,((Cetopsidae_Helogenes_marmoratus_P02_H03_RG88:68.709395,(Cetopsidae_Denticetopsis_macilenta_P02_B09_RG63:24.188978,Cetopsidae_Cetopsis_plumbea_P1_E11_RG13:24.188978)100:44.520417)100:16.877971,((Siluridae_Wallago_attu_P02_G01_RG84:50.838583,(Siluridae_Kryptopterus_cryptopterus_P02_D03_RG30:26.406963,Siluridae_Phalacronotus_bleekeri_P02_A04_RG07:26.406963)100:24.43162)100:31.633206,((((Pangasiidae_Helicophagus_leptorhynchus_P02_D02_RG72:41.434795,Pangasiidae_Pseudolais_pleurotaenia_P02_E01_RG48:41.434795)100:32.870082,((Mochokidae_Synodontis_batesii_P02_E08_RG04:50.07298,Mochokidae_Chiloglanis_occidentalis_P02_E11_RG13:50.07298)100:19.466716,(Claroteidae_Parauchenoglanis_balayi_P02_D09_RG64:60.290929,Claroteidae_Chrysichthys_cranchii_P02_E05_RG94:60.290929)95:9.248767)72:4.765181)35:2.077215,((Plotosidae_Plotosus_canius_P02_F06_RG60:69.799423,(Ictaluridae_Noturus_leptacanthus_P02_B08_RG57:32.441935,Ictaluridae_Ameiurus_nebulosus_P02_F07_RG33:32.441935)100:37.357488)50:3.747141,(Clariidae_Channallabes_apus_P02_D10_RG08:67.701893,((Ailiidae_Clupisoma_garua_P1_D11_RG58:24.90726,Ailiidae_Eutropiichthys_murius_P1_C12_RG43:24.90726)100:32.945385,((Bagridae_Bagrus_ubangensis_P02_G12_RG42:32.885958,Bagridae_Sperata_aor_P1_F08_RG53:32.885958)100:22.491135,(Sisoridae_Gagata_cenia_P02_G03_RG22:27.013597,Sisoridae_Gogangra_viridescens_P02_D04_RG91:27.013597)100:28.363496)38:2.475552)100:9.849248)48:5.844671)22:2.835528)23:2.391524,(((Aspredinidae_Ernstichthys_sp_P1_E10_RG61:39.793635,(Aspredinidae_Bunocephalus_amaurus_P02_B01_RG31:27.279435,Aspredinidae_Xyliphius_cryptos_P1_D09_RG64:27.279435)100:12.5142)100:27.026156,(((Auchenipteridae_Glanidium_leopardum_P02_C02_RG67:30.472633,(Auchenipteridae_Centromochlus_heckeli_P02_B06_RG06:27.971699,Auchenipteridae_Tatia_sp_P02_D05_RG71:27.971699)96:2.500934)100:15.981716,(Auchenipteridae_Auchenipterichthys_longimanus_P02_F12_RG66:44.3908,(Auchenipteridae_Trachelyopterus_sp_P02_D08_RG80:37.921416,(Auchenipteridae_Trachelyopterichthys_taeniatus_P02_D11_RG58:8.681136,Auchenipteridae_Trachelyichthys_sp_P02_E07_RG44:8.681136)100:29.24028)42:6.469384)91:2.063549)100:11.104839,((Doradidae_Acanthodoras_spinosissimus_P02_C08_RG17:49.226502,Doradidae_Scorpiodoras_sp_P02_A06_RG74:49.226502)88:6.144549,((Doradidae_Rhinodoras_armbrusteri_P02_H06_RG49:27.146825,Doradidae_Rynchodoras_woodsi_P1_D12_RG09:27.146825)100:13.593069,(Doradidae_Oxydoras_niger_P02_C09_RG93:36.455235,(Doradidae_Doras_micropoeus_P02_H09_RG83:31.941564,Doradidae_Platydoras_costatus_P02_B12_RG75:31.941564)86:4.513671)85:4.284659)100:14.631157)79:2.188137)100:9.260602)100:10.086008,(((Pseudopimelodidae_Microglanis_poecilus_P02_D01_RG52:27.6953,(Pseudopimelodidae_Batrochoglanis_villosus_P02_H10_RG34:9.299207,Pseudopimelodidae_Cephalosilurus_sp_P1_A10_RG54:9.299207)100:18.396094)100:37.659325,(Pimelodidae_Phractocephalus_hemioliopterus_P1_G12_RG42:37.4975,((Pimelodidae_Megalonema_platycephalum_P1_E09_RG24:22.09173,Pimelodidae_Pimelodus_albofasciatus_P1_B09_RG63:22.09173)100:11.141847,(Pimelodidae_Platysilurus_mucosus_P02_A03_RG82:30.043781,(Pimelodidae_Pseudoplatystoma_fasciatum_P1_D08_RG80:27.428333,Pimelodidae_Sorubim_elongatus_P1_E12_RG76:27.428333)73:2.615447)98:3.189797)100:4.263922)100:27.857126)85:4.758917,((Heptapteridae_Rhamdia_quelen_P1_A11_RG25:23.431367,(Heptapteridae_Rhamdella_leptosoma_P1_A12_RG23:13.036063,Heptapteridae_Pimelodella_cristata_P02_E03_RG87:13.036063)100:10.395304)100:14.263455,((Heptapteridae_Leptorhamdia_marmorata_P02_A05_RG38:21.62858,Heptapteridae_Brachyglanis_sp_P02_A09_RG36:21.62858)100:8.405664,(Heptapteridae_Heptapterus_brevior_P02_C03_RG40:23.554789,(Heptapteridae_Mastiglanis_sp_P02_E02_RG89:21.44543,(Heptapteridae_Cetopsorhamdia_insidiosa_P1_C10_RG47:18.367215,Heptapteridae_Imparfinis_hasemani_P02_B04_RG20:18.367215)92:3.078215)57:2.109358)100:6.479455)100:7.660579)100:32.41872)100:6.792257)56:1.867817)44:3.698173)54:3.115577)100:20.654869)100:14.191091)100:29.566675)100:10,(((Citharinidae_Citharinus_congicus_P3_C03_RG63:14.837075,Citharinidae_Citharinus_gibbosus_P3_E07_RG71:14.837075)100:93.759745,(Distichodontidae_Xenocharax_spilutus_P3_G08_RG61:86.33294,(Distichodontidae_Neolebias_ansorgii_P02_G08_RG68:55.774671,(Distichodontidae_Ichthyborus_ornatus_P3_G05_RG44:39.478953,((Distichodontidae_Hemigrammocharax_unioccelatus_P3_H04_RG78:26.378272,Distichodontidae_Nannocharax_taenia_P3_A08_RG16:26.378272)99:7.861723,((Distichodontidae_Distichodus_fasciolatus_P1_D06_RG50:25.318976,(Distichodontidae_Distichodus_decemmaculatus_P3_H03_RG28:22.072905,Distichodontidae_Distichodus_fasciolatus_P3_B01_RG54:22.072905)50:3.246071)99:7.254379,(Distichodontidae_Mesoborus_crocodilus_P3_F01_RG86:18.546913,(Distichodontidae_Belanophago_hutsebouti_P3_C02_RG57:16.427112,(Distichodontidae_Eugnathichthys_macroterolepis_P3_F06_RG09:9.992449,Distichodontidae_Phago_boulengeri_P3_A05_RG38:9.992449)100:6.434663)98:2.119801)100:14.026442)86:1.666641)96:5.238958)100:16.295718)100:30.558269)100:22.263879)100:46.441055,((Crenuchidae_Characidium_purpuratum_P1_E07_RG44:48.768605,(Crenuchidae_Characidium_zebra_P1_C01_RG65:8.604482,Crenuchidae_Characidium_fasciadorsale_P1_D03_RG30:8.604482)100:40.164122)100:83.807182,(((Ctenoluciidae_Boulengerella_lateristriga_P1_D05_RG71:84.135306,(Lebiasinidae_Pyrrhulina_filamentosa_P1_F05_RG92:69.209874,(Lebiasinidae_Lebiasina_provenzanoi_P1_F07_RG33:31.63399,Lebiasinidae_Lebiasina_aureoguttata_P1_B03_RG02:31.63399)100:37.575884)100:14.925432)100:37.47528,(Chalceidae_Chalceus_epakros_P1_A08_RG16:110.328185,((Acestrorhynchidae_Acestrorhynchus_microlepis_P1_H03_RG88:79.950776,Iguanodectidae_Bryconops_melanurus_P1_F04_RG45:79.950776)100:16.002096,((Triportheidae_Triportheus_rotundatus_P1_E05_RG94:85.663984,(Gasteropelecidae_Carnegiella_marthae_P1_D07_RG86:39.077292,Gasteropelecidae_Thoracocharax_stellatus_P1_B04_RG20:39.077292)100:46.586692)44:5.599517,((Characidae_Brachychalcinus_orbicularis_P1_A01_RG59:51.53866,((Characidae_Jupiaba_meunieri_P1_B08_RG57:38.823755,Characidae_Cheirodon_axelrodi_P3_A01_RG59:38.823755)93:6.143733,(Characidae_Astyanax_abramoides_P1_H01_RG11:41.936447,(Characidae_Hollandichthys_multifasciatus_P3_F07_RG48:37.833155,Characidae_Hyphessobrycon_sovichthys_P1_B05_RG90:37.833155)76:4.103292)63:3.031041)92:6.571172)100:19.401778,(((Characidae_Exodon_paradoxus_P1_A03_RG82:27.894685,Characidae_Roeboexodon_guyanensis_P02_G09_RG41:27.894685)100:33.268107,(Characidae_Tetragonopterus_chalceus_P1_G06_RG14:55.221207,(Characidae_Roeboides_descalvadensis_P3_G04_RG35:44.934715,Characidae_Acestrocephalus_ginesi_P1_B01_RG31:44.934715)100:10.286492)94:5.941585)100:5.21271,(((Characidae_Prodontocharax_alleni_P02_C10_RG47:27.307737,Characidae_Holoshestes_pequira_P1_A07_RG77:27.307737)100:28.239347,(Characidae_Leptagoniates_steindachneri_P02_G10_RG37:47.29542,(Characidae_Prionobrama_filigera_P02_G06_RG14:31.840552,Characidae_Aphyocharax_dentatus_P3_F05_RG58:31.840552)100:15.454868)100:8.251665)100:8.303878,(Characidae_Markiana_nigripinnis_P3_H06_RG45:54.895499,((Characidae_Acrobycon_ipanquianus_P3_C01_RG29:40.986322,Characidae_Hemibrycon_surinamensis_P1_D02_RG72:40.986322)78:5.493262,((Characidae_Glandulocauda_melanopleura_P3_H08_RG60:31.336399,Characidae_Mimagoniates_rheocharis_P3_G01_RG87:31.336399)100:13.66422,((Characidae_Corypoma_riisei_P3_E02_RG43:35.754394,Characidae_Pseudocorypoma_doriae_P3_B08_RG90:35.754394)100:8.176417,((Characidae_Lepidocharax_burnsi_P3_B02_RG25:37.732652,(Characidae_Ceratobranchia_obtusirostris_P1_C06_RG03:18.74831,Characidae_Creagrutus_beni_P3_B05_RG39:18.74831)100:18.984341)32:2.790779,(Characidae_Knodus_smithi_P3_A04_RG07:35.026113,(Characidae_Bryconamericus_stramineus_P3_C04_RG55:27.006102,(Characidae_Piabina_argentea_P3_A06_RG74:25.62109,((Characidae_Cyanocharax_uruguayensis_P3_A03_RG82:15.704395,Characidae_Scopaeocharax_sp_P3_E08_RG50:15.704395)100:7.137458,(Characidae_Odontostoechus_lethostigmus_P3_G03_RG94:15.127758,Characidae_Hypobrycon_leptorhynchus_P3_E06_RG91:15.127758)100:7.714095)98:2.779237)63:1.385012)100:8.020012)99:5.497317)79:3.407381)38:1.069808)51:1.478964)100:8.415915)100:8.955463)89:2.52454)97:4.564936)100:20.323063)89:4.689372)100:14.375312)100:11.282401)78:4.28592,((Hepsetidae_Hepsetus_odoe_P3_F08_RG89:109.437047,((Alestidae_Brycinus_poptae_P3_G06_RG04:36.514054,Alestidae_Brycinus_grandisquamis_P3_B03_RG23:36.514054)100:33.326227,((Alestidae_Hydrocynus_vittatus_P3_D04_RG03:31.587545,Alestidae_Hydrocynus_goliath_P3_D02_RG19:31.587545)100:21.414392,((Alestidae_Rhabdalestes_septentrionalis_P3_E01_RG70:30.688664,(Alestidae_Micralestes_acutidens_P1_G05_RG69:25.565655,Alestidae_Duboisialestes_tumbensis_P3_D03_RG81:25.565655)66:5.123009)100:17.432684,(Alestidae_Bryconalestes_longipinnis_P1_C05_RG81:41.082067,(Alestidae_Bathyaethiops_greeni_P3_H05_RG79:24.522669,Alestidae_Alestopetersius_hilgendorfi_P3_D01_RG40:24.522669)100:16.559398)94:7.03928)67:4.88059)100:16.838343)100:39.596766)100:13.451246,((Erythrinidae_Hoplias_aimara_P1_G04_RG10:37.488142,Erythrinidae_Hoplerythrinus_unitaeniatus_P1_E02_RG89:37.488142)100:81.32493,((((Cynodontidae_Cynodon_gibbus_P1_H02_RG32:46.494519,Cynodontidae_Hydrolycus_armatus_P1_C07_RG62:46.494519)100:52.412445,(Hemiodontidae_Bivibranchia_fowleri_P1_G03_RG22:41.617535,(Hemiodontidae_Hemiodus_argenteus_P1_A05_RG38:32.090075,Hemiodontidae_Hemiodus_thayeri_P1_B06_RG06:32.090075)95:9.527461)100:57.289429)53:5.345234,((Serrasalmidae_Colossoma_macropomum_P02_E06_RG35:41.415671,Serrasalmidae_Mylossoma_sp_P1_A04_RG07:41.415671)100:19.91583,((Serrasalmidae_Acnodon_oligacantus_P02_A08_RG16:36.167602,(Serrasalmidae_Myloplus_rubripinnis_P1_H05_RG15:32.867559,(Serrasalmidae_Ossubtus_sp_P02_F05_RG92:30.407377,Serrasalmidae_Myleus_pacu_P1_F02_RG78:30.407377)63:2.460182)72:3.300043)100:9.54675,(Serrasalmidae_Pristobrycon_striolatus_P02_B07_RG29:28.185993,((Serrasalmidae_Serrasalmus_manueli_P1_E06_RG35:13.955792,Serrasalmidae_Serrasalmus_gouldingi_P1_D04_RG91:13.955792)72:3.757801,(Serrasalmidae_Pygocentrus_nattereri_P1_E03_RG87:13.640418,Serrasalmidae_Serrasalmus_rhombeus_P1_A02_RG27:13.640418)54:4.073174)100:10.4724)100:17.528359)100:15.617149)100:42.920697)49:4.372531,((Parodontidae_Apareiodon_orinocoensis_P1_H06_RG49:45.075166,Parodontidae_Parodon_guyanensis_P1_G01_RG84:45.075166)100:58.540662,(((Prochilodontidae_Ichthyoelephas_longirostris_P3_B06_RG02:67.767097,(Prochilodontidae_Prochilodus_scrophus_P1_E04_RG21:34.446123,Prochilodontidae_Semaprochilodus_varii_P3_A09_RG36:34.446123)100:33.320974)100:13.692068,(Chilodontidae_Caenotropus_labyrinthicus_P1_C02_RG67:74.658483,(Curimatidae_Curimatopsis_crypticus_P3_H01_RG13:67.298604,(Curimatidae_Curimata_roseni_P3_E03_RG52:28.175293,(Curimatidae_Cyphocharax_abramoides_P3_C05_RG05:23.394029,Curimatidae_Psectrogaster_ciliata_P3_F02_RG80:23.394029)95:4.781265)100:39.123311)71:7.359879)96:6.800681)100:15.459119,((Anostomidae_Synaptolaemus_cingulatus_P1_G02_RG12:33.597797,(Anostomidae_Anostomus_ternetzi_P1_A06_RG74:24.215597,(Anostomidae_Pseudanos_winterbottomi_P1_H07_RG01:15.119476,Anostomidae_Petulanos_spiloclistron_P1_G07_RG18:15.119476)100:9.09612)98:9.3822)100:22.780408,(Anostomidae_Leporinus_brunneus_P1_H04_RG73:44.717624,((Anostomidae_Laemolyta_proxima_P1_D01_RG52:30.531516,Anostomidae_Schizodon_vittatus_P1_E01_RG48:30.531516)98:10.740739,((Anostomidae_Abramites_hypselonotus_P02_F10_RG26:30.303163,Anostomidae_Leporinus_striatus_P1_C03_RG40:30.303163)89:6.738105,(Anostomidae_Leporinus_agassizii_P1_B02_RG39:27.264239,Anostomidae_Leporinus_ortomaculatus_P1_F03_RG79:27.264239)89:9.77703)56:4.230987)35:3.445368)95:11.660581)100:40.540079)97:6.697545)65:5.008901)100:10.188343)68:4.075221)53:3.008213)82:6.679281)100:22.462087)100:4.962126)NA:12.899999)100:25.7)99:21.098547)100:10.501453)92:20.4,(Lepidogalaxiidae_Lepidogalaxias_salamandroides_G01350:231.8,(((Bathylagidae_Bathylagus_euryops_G01224:70.712354,(Microstomatidae_Nansenia_longicauda_ardesiaca_E00814:51.558629,(Opisthoproctidae_Macropinna_microstoma_G01368:33.234078,(Argentinidae_Argentina_sialis_silus_E00352:13.624566,Argentinidae_Argentina_striata_E01031:13.624566)42:19.609511)100:18.324551)98:19.153725)47:88.887646,((Galaxiidae_Aplochiton_taeniatus_G01517:50,(Galaxiidae_Galaxiella_nigrostriata_G01295:42.605636,(Galaxiidae_Neochanna_burrowsius_G01394:34.522004,(Galaxiidae_Brachygalaxias_bullocki_G01230:32.495986,Galaxiidae_Galaxias_maculatus_G01294:32.495986)100:2.026019)43:8.083632)98:7.394364)94:95.636629,(((Esocidae_Esox_lucius_E00688:31.386513,Esocidae_Esox_americanus_G01289:31.386513)100:48.013487,(Umbridae_Umbra_limi_E00086:55.772876,Umbridae_Novumbra_hubbsi_G01402:55.772876)100:23.627124)100:25.078403,(Salmonidae_Coregonus_clupeaformis_G01263:35.3,(Salmonidae_Thymallus_brevirostris_G01502:32.464307,(Salmonidae_Oncorhynchus_nerka_mykiss_E00437:19.947525,(Salmonidae_Salvelinus_alpinus_G01473:16.756184,(Salmonidae_Salmo_salar_G01522:14.861468,Salmonidae_Parahucho_perryi_G01418:14.861468)14:1.894716)49:3.191341)39:12.516782)100:2.835693)62:69.178403)100:41.158226)100:13.963371)100:55.254892,((((Retropinnidae_Retropinna_semoni_G01465:22.529514,Retropinnidae_Stokellia_anisodon_G01496:22.529514)100:51.170486,(((Osmeridae_Osmerus_mordax_G01409:10.347393,Osmeridae_Thaleichthys_pacificus_E00095:10.347393)64:5.877349,(Osmeridae_Mallotus_villosus_E00096:14.980241,Osmeridae_Hypomesus_pretiosus_G01333:14.980241)99:1.2445)76:18.137763,(Plecoglossidae_Plecoglossus_altivelis_G01440:28.725468,((Salangidae_Neosalanx_jordani_G01396:10.487235,Salangidae_Neosalangichthys_ishikawae_G01471:10.487235)97:2.238638,(Salangidae_Salanx_cuvieri_G01472:7.987388,Salangidae_Leucosoma_reevesii_G01357:7.987388)100:4.738485)86:15.999596)100:5.637036)100:39.337495)100:55.7,((Gonostomatidae_Diplophos_taenia_E00492:77.34295,((Gonostomatidae_Bonapartia_pedaliota_E00496:54.320038,Gonostomatidae_Margrethia_obtusirostra_G01370:54.320038)56:20.007411,(Gonostomatidae_Gonostoma_elongatum_E00679:69.964426,Gonostomatidae_Cyclothone_microdon_G01272:69.964426)65:4.363023)88:3.015501)54:6.45705,(Phosichthyidae_Pollichthys_mauli_G01443:77.73342,((Phosichthyidae_Polymetme_corythaeola_sp_E00036:67.565697,(Sternoptychidae_Polyipnus_spinifer_M30154:60.023759,((Sternoptychidae_Argyropelecus_gigas_G01207:10.75016,Sternoptychidae_Argyropelecus_affinis_E00062:10.75016)98:14.493519,(Sternoptychidae_Sternoptyx_sp_M37185:20.932156,Sternoptychidae_Maurolicus_weitzmani_E00088:20.932156)60:4.311523)100:34.780081)100:7.541938)91:5.012869,((Stomiidae_Chauliodus_sloani_E00678:20.419988,Stomiidae_Chauliodus_macouni_danae_E00426:20.419988)96:42.727184,((Stomiidae_Borostomias_antarcticus_E00813:23.038553,Stomiidae_Neonesthes_capensis_G01395:23.038553)59:17.725111,((Stomiidae_Heterophotus_ophistoma_E00660:34.302726,(Stomiidae_Stomias_boa_E00037:27.141256,Stomiidae_Rhadinesthes_decimus_E00812:27.141256)54:7.16147)64:1.805224,(Stomiidae_Astronesthes_leucopogon_M30297:35.40226,(Stomiidae_Chirostomias_pliopterus_E01000:31.596406,((Stomiidae_Melanostomias_margaritifer_E00782:21.80403,Stomiidae_Leptostomias_longibarba_E00483:21.80403)30:5.231986,((Stomiidae_Photonectes_margarita_E00966:19.065424,Stomiidae_Tactostoma_macropus_E00439:19.065424)65:7.217791,(Stomiidae_Photostomias_guernei_E00995:24.056718,(Stomiidae_Malacosteus_niger_E00783:23.385988,(Stomiidae_Eustomias_polyaster_E00778:23.058021,(Stomiidae_Aristostomias_scintillans_E00065:23.044457,Stomiidae_Bathophilus_flemingi_pawneei_E00063:23.044457)100:0.013564)4:0.327967)16:0.67073)19:2.226497)83:0.752802)81:4.560389)88:3.805854)92:0.70569)49:4.655714)94:22.383508)100:9.431394)89:5.154853)61:6.06658)65:45.6)100:81.9,((Ateleopodidae_Ateleopus_japonicus_G01213:8.100975,(Ateleopodidae_Ijimaia_antillarum_E00685:1.851199,Ateleopodidae_Ijimaia_loppei_M03698:1.851199)97:6.249776)98:184.199025,(((Synodontidae_Synodus_variegatus_M31058:50.706529,(Synodontidae_Trachinocephalus_myops_E00642:34.936529,Synodontidae_Synodus_foetens_E00757:34.936529)77:15.77)100:63.193471,(((Pseudotrichonotidae_Pseudotrichonotus_altivelis_G01456:85.069082,Paraulopidae_Paraulopus_oblongus_G01422:85.069082)99:16.922086,(Synodontidae_Saurida_gracilis_E00703:50.265907,(Synodontidae_Harpadon_microchir_G01313:42.546554,Synodontidae_Saurida_undosquamis_G01475:42.546554)79:7.719353)60:51.725261)96:8.324299,(((Aulopidae_Aulopus_filamentosus_E00502:47.181996,Bathysauridae_Bathysaurus_ferox_E00785:47.181996)19:10.847641,(Ipnopidae_Bathypterois_grallator_E01017:52.456704,Ipnopidae_Ipnops_sp_G01523:52.456704)15:5.572933)40:23.632996,((Ipnopidae_Bathypterois_atricolor_G01225:69.350219,(Giganturidae_Gigantura_indica_E00658:13.530161,Giganturidae_Gigantura_chuni_E00818:13.530161)100:55.820059)100:6.463444,((Scopelarchidae_Benthalbella_macropinna_E00033:31.410753,(Scopelarchidae_Benthalbella_dentata_E00440:8.014962,Scopelarchidae_Benthalbella_infans_M01724:8.014962)20:23.395791)100:31.100655,((Chlorophthalmidae_Chlorophthalmus_agassizi_E00045:56.023798,Scopelarchidae_Scopelarchus_sp_E00493:56.023798)11:5.132849,(Chlorophthalmidae_Parasudis_truculenta_E01034:59.829934,((Notosudidae_Ahliesaurus_berryi_E00661:25.638925,Notosudidae_Scopelosaurus_lepidus_E00479:25.638925)88:33.459363,(Sudidae_Sudis_atrox_E00093:55.043996,((Alepisauridae_Anotopterus_pharao_E00964:45.676404,(Alepisauridae_Omosudis_lowii_E00999:36.295606,(Alepisauridae_Alepisaurus_brevirostris_E00653:28.879812,Alepisauridae_Alepisaurus_ferox_E00965:28.879812)59:7.415794)100:9.380798)81:8.24094,((Paralepididae_Stemonosudis_intermedia_macrura_E00973:38.680632,Lestidiidae_Lestidiops_jayakari_E00497:38.680632)48:11.457751,((Evermannellidae_Evermannella_balbo_E00815:17.517053,Evermannellidae_Coccorella_atlantica_E00669:17.517053)85:29.184168,(Paralepididae_Paralepis_coregonoides_E00486:36.168036,(Paralepididae_Notolepis_coatsi_M24522:0.464449,Paralepididae_Magnisudis_prionosa_M24520:0.464449)98:35.703586)100:10.533185)97:3.437163)78:3.77896)88:1.126652)46:4.054292)100:0.731646)21:1.326713)20:1.354762)84:13.302255)22:5.848969)23:28.652834)93:3.584533)100:68.9,((((Neoscopelidae_Neoscopelus_macrolepidotus_E00451:21.513581,Neoscopelidae_Neoscopelus_microchir_G01397:21.513581)100:20.906388,(Neoscopelidae_Scopelengys_sp_M35984:5.004968,Neoscopelidae_Scopelengys_tristis_G01479:5.004968)100:37.415001)100:31.180031,(((Myctophidae_Notolychnus_valdiviae_E00011:40.191883,Myctophidae_Lobianchia_gemellarii_E00010:40.191883)78:5.72165,(Myctophidae_Lampadena_speculigera_E00781:39.826216,((Myctophidae_Lepidophanes_guentheri_E00499:21.437275,(Myctophidae_Ceratoscopelus_maderensis_E00048:10.546561,Myctophidae_Ceratoscopelus_warmingii_E00495:10.546561)88:10.890714)100:16.309947,(Myctophidae_Stenobrachius_leucopsarus_E00067:31.265086,(Myctophidae_Nannobrachium_lineatum_E00790:26.763615,(Myctophidae_Lampanyctus_macdonaldi_E00967:25.484025,Myctophidae_Lampanyctus_jordani_M22102:25.484025)97:1.27959)27:4.501471)86:6.482136)100:2.078994)64:6.087317)79:5.783799,((Myctophidae_Notoscopelus_caudispinosus_resplendens_E00668:34.855362,(Myctophidae_Gymnoscopelus_nicholsi_G01309:16.628589,(Myctophidae_Gymnoscopelus_opisthopterus_M22070:4.496985,Myctophidae_Gymnoscopelus_braueri_M22066:4.496985)96:12.131605)100:18.226773)100:10.019237,((Myctophidae_Diaphus_sp_M35870:15.207586,(Myctophidae_Symbolophorus_californiensis_E00061:10.112904,Myctophidae_Diaphus_rafinesquii_M22033:10.112904)100:5.094681)92:25.47779,((Myctophidae_Electrona_antarctica_M22055:14.428311,(Myctophidae_Protomyctophum_choriodon_M22162:3.104448,Myctophidae_Krefftichthys_anderssoni_G01340:3.104448)49:11.323863)100:15.182154,(Myctophidae_Benthosema_glaciale_E00494:28.308863,(Myctophidae_Myctophum_punctatum_E00500:26.445525,((Myctophidae_Tarletonbeania_crenularis_E00059:21.42145,Myctophidae_Symbolophorus_evermanni_M22177:21.42145)96:2.82265,(Myctophidae_Hygophum_hygomii_E00664:16.998146,Myctophidae_Hygophum_proximum_M22078:16.998146)96:7.245955)95:2.201425)93:1.863337)77:1.301602)100:11.074911)100:4.189223)96:6.822733)86:21.902668)100:99.5,(((Lophotidae_Lophotus_lacepede_E00822:81.7,(Lampridae_Lampris_guttatus_E00682:65.554566,((Regalecidae_Regalecus_russelii_G01464:12.163691,Regalecidae_Regalecus_glesne_E00811:12.163691)99:25.521954,(Trachipteridae_Desmodema_polystictum_E00974:29.911651,(Trachipteridae_Zu_cristatus_E01014:24.186495,(Trachipteridae_Trachipterus_trachypterus_M31447:0.7242,Trachipteridae_Trachipterus_arcticus_E00780:0.7242)68:23.462295)100:5.725156)85:7.773994)100:27.868921)100:16.145434)82:68.6,(((Percopsidae_Percopsis_transmontana_E00189:14.617956,Percopsidae_Percopsis_omiscomaycus_G01433:14.617956)100:48.582044,(Aphredoderidae_Aphredoderus_sayanus_E00151:41.5,(Amblyopsidae_Speoplatyrhinus_poulsoni_G01490:10.886201,(Amblyopsidae_Chologaster_cornuta_G01254:10.2227,Amblyopsidae_Troglichthys_rosae_G01198:10.2227)89:0.663501)43:30.613799)100:21.7)100:71.791036,((Zeniontidae_Cyttomimus_affinis_M32320:66.46081,(Parazenidae_Cyttopsis_rosea_E01032:49.2,(Zeidae_Zenopsis_conchifer_E00449:33.5,Zeidae_Zeus_faber_E01138:33.5)100:15.7)100:17.26081)100:40.63919,(Stylephoridae_Stylephorus_chordatus_E00997:78.8,((Merlucciidae_Merluccius_bilinearis_E00341:4.814876,Merlucciidae_Merluccius_productus_E00436:4.814876)43:40.84028,(((Bathygadidae_Gadomus_dispar_E00455:9.947709,Bathygadidae_Bathygadus_favosus_E00485:9.947709)74:28.939232,(Steindachneriidae_Steindachneria_argentea_E01013:35.929201,((Macrouridae_Malacocephalus_laevis_E00342:17.761913,(Macrouridae_Trachonurus_sulcatus_E00969:15.565951,(Macrouridae_Nezumia_liolepis_E00356:6.541893,(Macrouridae_Nezumia_bairdii_E01030:2.978829,Macrouridae_Nezumia_aequalis_E00962:2.978829)72:3.563064)100:9.024057)100:2.195963)82:10.126442,(Macrouridae_Macrourus_sp_M35664:21.89946,((Macrouridae_Coelorinchus_caribbaeus_E00519:9.832864,Macrouridae_Coelorinchus_caelorhincus_E00579:9.832864)96:12.050918,((Macrouridae_Coryphaenoides_armatus_M20312:8.70583,Macrouridae_Coryphaenoides_rupestris_E00676:8.70583)99:4.710541,(Macrouridae_Coryphaenoides_cinereus_E00418:4.721775,(Macrouridae_Coryphaenoides_acrolepis_E00428:1.374282,Macrouridae_Albatrossia_pectoralis_E00360:1.374282)40:3.347494)100:8.694595)85:8.467411)100:0.015678)64:5.988896)100:8.040846)100:2.95774)100:2.613059,((Muraenolepididae_Muraenolepis_marmorata_M01728:36.494611,(Moridae_Physiculus_fulvus_E01009:29.55261,((Moridae_Laemonema_goodebeanorum_E00457:2.50946,Moridae_Laemonema_barbatulum_E00412:2.50946)97:22.579308,(Moridae_Halargyreus_johnsonii_E00789:16.444964,(Moridae_Lepidion_ensiferus_E00334:5.357055,(Moridae_Antimora_rostrata_E00786:0.544543,Moridae_Antimora_microlepis_E00419:0.544543)96:4.812512)100:11.087909)100:8.643804)100:4.463842)91:6.942001)92:1.765507,((Phycidae_Phycis_chesteri_E00377:8.03866,(Phycidae_Urophycis_tenuis_E00344:5.240438,(Phycidae_Urophycis_regia_E00576:4.089468,Phycidae_Urophycis_chuss_E00343:4.089468)87:1.15097)94:2.798222)100:25.809917,((Gaidropsaridae_Enchelyopus_cimbrius_E00369:12.351856,(Gaidropsaridae_Gaidropsarus_ensis_E00784:1.063842,Gaidropsaridae_Gaidropsarus_argentatus_E00478:1.063842)86:11.288014)100:17.448721,(Lotidae_Lota_lota_E00489:23.935379,(Gadidae_Micromesistius_poutassou_E00491:16.109498,((Gadidae_Gadus_chalcogrammus_E00434:10.882128,Gadidae_Microgadus_proximus_E00333:10.882128)89:0.783593,(Gadidae_Pollachius_virens_E00372:7.113829,((Gadidae_Melanogrammus_aeglefinus_E00376:4.868482,Gadidae_Merlangius_merlangus_E00490:4.868482)87:0.835458,(Gadidae_Gadus_morhua_E00375:3.387043,Gadidae_Gadus_ogac_E00470:3.387043)57:2.316897)59:1.40989)56:4.551892)42:4.443778)62:7.82588)88:5.865199)100:4.047999)100:4.411542)30:3.239882)70:4.155156)100:33.144844)100:28.3)100:27.891036)100:15.308964)100:11.083092,((Polymixiidae_Polymixia_japonica_E00019:13.716067,Polymixiidae_Polymixia_lowei_E01025:13.716067)100:141.083933,((((Diretmidae_Diretmus_argenteus_E01114:19.059513,Diretmidae_Diretmichthys_parini_E00472:19.059513)100:34.941385,((Monocentridae_Monocentris_japonica_G01376:27.989531,Anomalopidae_Anomalops_katoptron_M02573:27.989531)61:5.610469,((Trachichthyidae_Hoplostethus_occidentalis_atlanticus_E01018:24.361641,Trachichthyidae_Gephyroberyx_darwinii_E00649:24.361641)35:7.918771,(Anoplogastridae_Anoplogaster_cornuta_E00662:31.227874,(Trachichthyidae_Paratrachichthys_sajademalensis_G01421:17.556284,Trachichthyidae_Aulotrachichthys_prosthemius_M31392:17.556284)100:13.671591)100:1.052538)96:1.319587)100:20.400898)100:71.278167,(((Berycidae_Beryx_decadactylus_E00159:27.236685,Berycidae_Centroberyx_druzhinini_G01238:27.236685)100:43.380061,((Melamphaidae_Poromitra_crassiceps_E01061:24.92187,Melamphaidae_Scopeloberyx_sp_M35693:24.92187)97:14.219431,(Melamphaidae_Scopelogadus_beanii_E00670:32.606123,(Melamphaidae_Melamphaes_suborbitalis_E01062:16.3971,Melamphaidae_Melamphaes_lugubris_polylepis_E00427:16.3971)96:16.209023)100:6.535178)100:31.475445)100:40.297009,(((Rondeletiidae_Rondeletia_bicolor_E01059:18.618698,Rondeletiidae_Rondeletia_loricata_E01058:18.618698)73:36.665959,(Barbourisiidae_Barbourisia_rufa_G01222:46.226385,Stephanoberycidae_Acanthochaenus_luetkenii_M30097:46.226385)100:9.058271)100:34.605995,(Cetomimidae_Cetostoma_regani_E01060:55.496341,(Cetomimidae_Gyrinomimus_bruuni_E00654:21.253797,(Cetomimidae_Cetomimus_craneae_E01116:10.538684,(Cetomimidae_Gyrinomimus_parri_sp_E00482:6.885038,Cetomimidae_Cetomimus_sp_G01240:6.885038)76:3.653645)76:10.715114)100:34.242544)100:34.394311)78:21.023104)100:14.36531)100:21.1846,((((Holocentridae_Ostichthys_trachypoma_E00161:25.197942,(Holocentridae_Plectrypops_lima_E00720:11.854458,Holocentridae_Plectrypops_retrospinis_E00504:11.854458)100:13.343484)100:5.908719,((Holocentridae_Myripristis_murdjan_M17691:6.23309,Holocentridae_Myripristis_violacea_G01386:6.23309)78:7.08274,(Holocentridae_Myripristis_vittata_E00527:7.901223,(Holocentridae_Myripristis_hexagona_E00543:5.776899,Holocentridae_Myripristis_berndti_E01070:5.776899)100:2.124324)88:5.414607)90:17.790831)98:21.393339,((Holocentridae_Sargocentron_diadema_E01082:25.435851,(Holocentridae_Holocentrus_rufus_E01046:20.788942,(Holocentridae_Sargocentron_caudimaculatum_E01071:7.933452,Holocentridae_Sargocentron_tiere_E01105:7.933452)65:12.855491)100:4.646908)87:3.038179,(Holocentridae_Sargocentron_cornutum_G01474:24.250916,(Holocentridae_Neoniphon_marianus_E00103:21.359672,(Holocentridae_Sargocentron_coruscum_E00105:18.908723,(Holocentridae_Sargocentron_vexillarium_E00101:15.375324,(Holocentridae_Neoniphon_argenteus_E00731:9.482812,(Holocentridae_Neoniphon_opercularis_E01042:7.311803,Holocentridae_Neoniphon_sammara_E01072:7.311803)100:2.171009)47:5.892512)67:3.533399)48:2.450949)30:2.891244)37:4.223113)69:24.02597)100:92.5,((((((((((Polycentridae_Polycentropsis_abbreviata_N26006:45.355401,(Polycentridae_Polycentrus_schomburgkii_G01444:27.358566,Polycentridae_Monocirrhus_polyacanthus_G01377:27.358566)100:17.996835)100:48.502201,(Pholidichthyidae_Pholidichthys_leucotaenia_E00251:88.7,((Cichlidae_Paretroplus_maculatus_G01423:48.188878,Cichlidae_Etroplus_maculatus_E00133:48.188878)100:28.211122,(((Cichlidae_Cichla_temensis_G01256:52.822672,(Cichlidae_Crenicichla_lepidota_E00137:50.1,(Cichlidae_Heros_efasciatus_G01320:26.393613,(Cichlidae_Symphysodon_discus_E00390:20.818349,Cichlidae_Herichthys_cyanoguttatus_G01319:20.818349)60:5.575264)99:23.706387)100:2.722672)100:9.315547,(Cichlidae_Heterochromis_multidens_G01321:57.342397,(Cichlidae_Nanochromis_parilus_G01390:29.51521,(Cichlidae_Oreochromis_niloticus_G01407:18.18203,((Cichlidae_Steatocranus_gibbiceps_G01494:11.988974,(Cichlidae_Neolamprologus_brichardi_G01520:8.909432,(Cichlidae_Astatotilapia_burtoni_G01518:4.010091,(Cichlidae_Pundamilia_nyererei_G01521:2.680587,Cichlidae_Maylandia_zebra_G01519:2.680587)99:1.329503)100:4.899341)100:3.079542)100:3.181149,Cichlidae_Tilapia_louka_G01503:15.170123)99:3.011908)100:11.333179)100:27.827187)88:4.795821)100:6.540613,(Cichlidae_Paratilapia_polleni_G01420:49.556467,Cichlidae_Ptychochromis_grandidieri_G01459:49.556467)100:19.122364)100:7.721169)100:12.3)94:5.157603)40:0.467544,(((((Hemiramphidae_Arrhamphus_sclerolepis_G01209:25.053115,(Hemiramphidae_Hyporhamphus_dussumieri_E01086:12.738844,Hemiramphidae_Hyporhamphus_affinis_E01068:12.738844)100:12.314271)100:14.021965,((Hemiramphidae_Oxyporhamphus_micropterus_E00397:12.991455,Hemiramphidae_Hemiramphus_brasiliensis_E00098:12.991455)100:12.67575,(Exocoetidae_Parexocoetus_brachypterus_E00645:19.729363,((Exocoetidae_Cypselurus_callopterus_E00402:7.633289,Exocoetidae_Exocoetus_monocirrhus_E00403:7.633289)100:3.331328,((Exocoetidae_Cheilopogon_pinnatibarbatus_E00399:8.052673,Exocoetidae_Cheilopogon_melanurus_N14975:8.052673)57:1.278961,(Exocoetidae_Hirundichthys_marginatus_E00401:7.641497,(Exocoetidae_Prognichthys_brevipinnis_E00400:4.015355,Exocoetidae_Cheilopogon_dorsomacula_E00624:4.015355)100:3.626142)97:1.690138)66:1.632983)100:8.764746)100:5.937842)100:13.407874)100:9.855394,(Zenarchopteridae_Zenarchopterus_dispar_E00541:34.632278,(((Belonidae_Xenentodon_cancila_G01508:20.794551,(Belonidae_Tylosurus_crocodilus_E01051:7.140525,Belonidae_Ablennes_hians_E00162:7.140525)100:13.654026)99:5.247355,(Belonidae_Strongylura_notata_E00110:21.832024,((Belonidae_Scomberesox_saurus_E00404:2.187207,Belonidae_Cololabis_saira_E00192:2.187207)100:18.196541,Belonidae_Platybelone_argalus_E00114:20.383747)65:1.448277)100:4.209882)100:6.432052,Zenarchopteridae_Dermogenys_collettei_G01275:32.473958)93:2.15832)100:14.298196)100:24.281986,Adrianichthyidae_Oryzias_latipes_G01408:73.21246)79:4.18754,((Aplocheilidae_Pachypanchax_playfairii_G01414:69.331698,((Poeciliidae_Poecilia_latipinna_reticulata_E01065:17.387078,(Poeciliidae_Heterandria_formosa_E00185:15.054996,((Poeciliidae_Belonesox_belizanus_E01052:9.229173,Poeciliidae_Gambusia_affinis_G01296:9.229173)100:5.023345,Poeciliidae_Poeciliopsis_elongata_N01734:14.252518)40:0.802478)67:2.332082)100:29.768241,((Cyprinodontidae_Floridichthys_carpio_E01063:21.816926,(Cyprinodontidae_Cyprinodon_variegatus_E01066:15.295568,Cyprinodontidae_Jordanella_floridae_N14002:15.295568)100:6.521358)100:21.471302,(Fundulidae_Fundulus_parvipinnis_E00389:22.476633,(Fundulidae_Lucania_parva_goodei_E01064:17.630485,(Fundulidae_Fundulus_heteroclitus_G01293:16.573902,(Fundulidae_Adinia_xenica_E00173:12.964992,(Fundulidae_Fundulus_blairae_E00130:11.902635,Fundulidae_Fundulus_chrysotus_E00186:11.902635)71:1.062357)100:3.60891)57:1.056583)100:4.846148)100:20.811594)97:3.867091)100:22.176379)100:7.359525,(((Atherinopsidae_Membras_martinica_E00170:28.044767,(Atherinopsidae_Labidesthes_sicculus_E01112:14.447482,((Atherinopsidae_Poblana_ferdebueni_N01733:5.144774,Atherinopsidae_Menidia_beryllina_E00174:5.144774)62:1.004571,(Atherinopsidae_Menidia_menidia_E00167:5.367978,Atherinopsidae_Menidia_peninsulae_N03847:5.367978)61:0.781366)100:8.298138)100:13.597284)100:21.324169,(Atherinopsidae_Atherinopsis_californiensis_E00121:20.572906,((Atherinopsidae_Odontesthes_argentinensis_E00393:1.129348,(Atherinopsidae_Odontesthes_bonariensis_E00396:1.069788,Atherinopsidae_Odontesthes_retropinnis_E00395:1.069788)55:0.05956)100:7.505525,Atherinopsidae_Odontesthes_humensis_E00394:8.634873)100:11.938034)100:28.796029)100:21.671787,(Isonidae_Iso_sp_E00145:49.934732,(((((Phallostethidae_Phenacostethus_smithi_E00398:29.742831,(Pseudomugilidae_Pseudomugil_signifer_E00184:20.755625,Pseudomugilidae_Pseudomugil_gertrudae_E00182:20.755625)100:8.987206)100:5.260043,Telmatherinidae_Marosatherina_ladigesi_E00406:35.002874)100:5.866849,(Melanotaeniidae_Rhadinocentrus_ornatus_E00183:27.183273,(Melanotaeniidae_Melanotaenia_splendida_E00179:10.063907,(Melanotaeniidae_Melanotaenia_sp_N35702:6.439081,Melanotaeniidae_Melanotaenia_trifasciata_E00178:6.439081)68:3.624827)100:17.119366)100:13.68645)93:3.462138,(Atherinidae_Craterocephalus_honoriae_E00180:40.039683,((Atherinidae_Atherinomorus_vaigiensis_E00181:14.545008,Atherinidae_Atherinomorus_lacunosus_E00548:14.545008)100:11.943934,Atherinidae_Atherinomorus_stipes_E00115:26.488943)100:13.55074)86:4.292177)69:2.242105,Bedotiidae_Rheocles_wrightae_G01467:46.573965)69:3.360767)100:21.105991)100:5.650501)17:0.708777)100:16.925146)50:2.199613,(((((Congrogadidae_Natalichthys_sam_E00589:12.223935,Congrogadidae_Congrogadus_subducens_G01262:12.223935)95:5.760041,Congrogadidae_Halidesmus_scapularis_E00793:17.983976)100:66.597761,((Pomacentridae_Parma_microlepis_E00286:29.956661,((((Pomacentridae_Microspathodon_bairdii_G01375:7.520769,Pomacentridae_Microspathodon_chrysurus_E00772:7.520769)96:5.682685,Pomacentridae_Hypsypops_rubicundus_E00459:13.203454)100:6.09968,(Pomacentridae_Plectroglyphidodon_dickii_E00572:10.042904,Pomacentridae_Plectroglyphidodon_johnstonianus_E00722:10.042904)100:9.26023)96:5.12935,(Pomacentridae_Lepidozygus_tapeinosoma_E00929:23.54328,((Pomacentridae_Stegastes_partitus_E00204:12.134204,(Pomacentridae_Stegastes_diencaeus_E00219:3.830204,Pomacentridae_Stegastes_fuscus_E00203:3.830204)100:8.304)100:9.692679,Pomacentridae_Stegastes_albifasciatus_E00713:21.826883)44:1.716397)68:0.889204)100:5.524177)100:5.643339,((((Pomacentridae_Chromis_cyanea_E00201:20.979112,Pomacentridae_Azurina_hirundo_E00580:20.979112)78:4.504717,(Pomacentridae_Chromis_dimidiata_E00851:21.881743,(((Pomacentridae_Dascyllus_trimaculatus_E00865:3.707742,Pomacentridae_Dascyllus_reticulatus_E00724:3.707742)100:3.241853,Pomacentridae_Dascyllus_carneus_E00862:6.949595)100:4.95932,Pomacentridae_Dascyllus_aruanus_E00700:11.908915)100:9.972828)100:3.602086)36:1.204723,Pomacentridae_Chromis_atripectoralis_E00238:26.688552)100:6.144456,((Pomacentridae_Abudefduf_saxatilis_E00820:6.718582,(Pomacentridae_Abudefduf_sexfasciatus_E00881:2.487662,Pomacentridae_Abudefduf_vaigiensis_E00890:2.487662)99:4.23092)100:25.101941,(((((((Pomacentridae_Neoglyphidodon_polyacanthus_E00285:11.247413,Pomacentridae_Neoglyphidodon_melas_E00465:11.247413)99:4.269454,(Pomacentridae_Amblyglyphidodon_leucogaster_E00529:14.508934,Pomacentridae_Acanthochromis_polyacanthus_E00466:14.508934)69:1.007933)96:2.978969,((Pomacentridae_Pomacentrus_pavo_E00729:10.684072,Pomacentridae_Pomacentrus_spilotoceps_E00557:10.684072)95:1.463317,Pomacentridae_Pomacentrus_brachialis_E00239:12.14739)100:6.348446)55:1.661382,Pomacentridae_Neopomacentrus_cyanomos_E00933:20.157218)41:0.142911,(Pomacentridae_Amphiprion_ocellaris_E00193:15.341635,Pomacentridae_Amphiprion_clarkii_E00196:15.341635)94:4.958495)76:1.218896,(Pomacentridae_Dischistodus_perspicillatus_E00464:17.31279,Pomacentridae_Pomachromis_richardsoni_E00559:17.31279)81:4.206236)73:2.156532,Pomacentridae_Chrysiptera_taupou_E00564:23.675558)100:8.144965)63:1.012484)100:2.766993)100:48.981737)45:9.238174,(((Embiotocidae_Amphistichus_argenteus_E00129:13.402836,((Embiotocidae_Cymatogaster_aggregata_E00139:7.364037,Embiotocidae_Hyperprosopon_anale_argenteum_E00134:7.364037)40:3.767223,((Embiotocidae_Zalembius_rosaceus_E00135:3.565847,(Embiotocidae_Rhacochilus_vacca_E00124:2.865576,Embiotocidae_Phanerodon_furcatus_E00122:2.865576)63:0.700271)99:2.643123,(Embiotocidae_Embiotoca_jacksoni_E00120:4.728345,Embiotocidae_Embiotoca_lateralis_N14635:4.728345)84:1.480625)100:4.92229)40:2.271576)100:73.523087,(((Mugilidae_Mugil_cephalus_E00049:23.003227,(Mugilidae_Mugil_curema_E00031:19.693019,Mugilidae_Mugil_trichodon_E00765:19.693019)98:3.310209)100:15.699582,((Mugilidae_Myxus_capensis_E00809:21.87682,(Mugilidae_Liza_richardsonii_E00808:14.307491,Mugilidae_Chelon_macrolepis_E00845:14.307491)100:7.569328)100:6.858034,(Mugilidae_Moolgarda_engeli_E00739:17.733997,(Mugilidae_Valamugil_buchanani_E00847:8.759489,Mugilidae_Crenimugil_crenilabis_E00846:8.759489)100:8.974508)100:11.000857)100:9.967956)98:6.941736,Mugilidae_Neomyxus_leuciscus_E00742:45.644545)100:41.281378)61:4.712811,((Grammatidae_Lipogramma_trilineata_E00210:36.494683,Grammatidae_Lipogramma_anabantoides_E00211:36.494683)100:52.662166,((Plesiopidae_Plesiops_melas_G01442:7.549045,Plesiopidae_Plesiops_coeruleolineatus_E00855:7.549045)100:80.540418,((Grammatidae_Gramma_loreto_E00280:82.720871,((((Gobiesocidae_Arcos_sp_E00102:20.707783,Gobiesocidae_Gobiesox_maeandricus_G01302:20.707783)100:20.777685,(Gobiesocidae_Lepadichthys_lineatus_E01080:16.597005,Gobiesocidae_Diademichthys_lineatus_G01276:16.597005)100:24.888464)100:37.522198,(((Tripterygiidae_Enneapterygius_gruschkai_E00916:49.432349,((Tripterygiidae_Helcogramma_fuscopinna_E00885:10.90608,Tripterygiidae_Helcogramma_ellioti_sp_E00331:10.90608)99:15.957294,Tripterygiidae_Enneapterygius_abeli_E00896:26.863373)100:22.568976)56:8.409125,(Tripterygiidae_Enneanectes_boehlkei_E00305:33.356978,Tripterygiidae_Enneanectes_altivelis_E00315:33.356978)57:24.484496)100:18.815505,((((((Chaenopsidae_Acanthemblemaria_aspera_E00320:10.413477,Chaenopsidae_Acanthemblemaria_paula_E00295:10.413477)100:14.143921,(Chaenopsidae_Emblemaria_pandionis_E00310:18.069516,(Chaenopsidae_Chaenopsis_sp_alepidota_E00313:12.192873,Chaenopsidae_Lucayablennius_zingaro_E00294:12.192873)100:5.876643)100:6.487882)100:22.668215,((Labrisomidae_Paraclinus_marmoratus_E00309:35.658703,Labrisomidae_Stathmonotus_stahli_E00317:35.658703)93:8.471389,(Dactyloscopidae_Gillellus_semicinctus_G01299:33.786267,Dactyloscopidae_Platygillellus_rubrocinctus_E00319:33.786267)85:10.343824)41:3.095521)43:2.261613,(((Labrisomidae_Starksia_atlantica_E00304:22.481024,(Labrisomidae_Starksia_fasciata_E00303:17.102326,Labrisomidae_Starksia_ocellata_E00318:17.102326)69:5.378697)100:18.422013,((Labrisomidae_Labrisomus_nigricinctus_E00302:23.034805,Labrisomidae_Labrisomus_guppyi_multiporosus_E00300:23.034805)95:12.309191,((Labrisomidae_Malacoctenus_triangulatus_E00321:19.140327,Labrisomidae_Malacoctenus_aurolineatus_E00299:19.140327)96:11.834513,Labrisomidae_Labrisomus_bucciferus_E00301:30.97484)62:4.369155)67:5.55904)72:5.290612,Chaenopsidae_Neoclinus_blanchardi_E00326:46.193648)33:3.293578)83:2.702135,(Clinidae_Gibbonsia_metzi_N09738:26.791705,((Clinidae_Clinus_superciliosus_E00803:8.898558,(Clinidae_Clinus_cottoides_E00804:7.483712,Clinidae_Muraenoclinus_dorsalis_E00805:7.483712)42:1.414847)72:0.765025,(Clinidae_Pavoclinus_profundus_E00799:3.454105,Clinidae_Blennophis_striatus_E00800:3.454105)92:6.209478)100:17.128122)92:25.397656)97:16.915603,((Blenniidae_Ecsenius_midas_E00934:21.937706,(Blenniidae_Ecsenius_pardus_E00523:9.945375,Blenniidae_Ecsenius_opsifrontalis_E00723:9.945375)100:11.992332)99:26.201919,((((Blenniidae_Ophioblennius_atlanticus_E00296:21.876806,(Blenniidae_Cirripectes_quagga_E00330:17.615746,(Blenniidae_Cirripectes_castaneus_E00892:13.293312,Blenniidae_Cirripectes_filamentosus_E00893:13.293312)83:4.322434)73:4.26106)36:1.810121,Blenniidae_Cirripectes_stigmaticus_E00520:23.686927)100:13.765182,((Blenniidae_Stanulus_sp_E00332:27.929543,(Blenniidae_Alticus_arnoldorum_E00989:22.652862,((Blenniidae_Atrosalarias_fuscus_E00525:5.834331,Blenniidae_Salarias_fasciatus_E00988:5.834331)100:13.124812,Blenniidae_Nannosalarias_nativitatis_E00521:18.959143)80:3.693719)83:5.276681)55:3.670504,(Blenniidae_Praealticus_caesius_E00329:23.533982,((((Blenniidae_Blenniella_paula_E00979:10.105367,Blenniidae_Istiblennius_dussumieri_E00556:10.105367)79:4.376006,Blenniidae_Ecsenius_bicolor_E00984:14.481373)87:3.569846,(Blenniidae_Blenniella_cyanostigma_E00715:1.892611,Blenniidae_Blenniella_chrysospilos_paula_E00986:1.892611)100:16.158609)96:4.189488,(Blenniidae_Entomacrodus_nigricans_E00297:10.60808,(Blenniidae_Entomacrodus_niuafoouensis_E00980:3.218847,Blenniidae_Entomacrodus_striatus_E00987:3.218847)100:7.389232)100:11.632627)57:1.293275)99:8.066066)65:5.852061)79:6.951277,((Blenniidae_Enchelyurus_flavipes_N04786:35.806608,(Blenniidae_Petroscirtes_mitratus_E00909:23.105065,(Blenniidae_Meiacanthus_oualanensis_grammistes_E00526:20.726459,(Blenniidae_Plagiotremus_rhinorhynchos_E00586:15.480519,Blenniidae_Plagiotremus_tapeinosoma_E00540:15.480519)91:5.245939)48:2.378606)100:12.701544)61:2.247258,(Blenniidae_Hypsoblennius_hentz_E00289:29.204243,Blenniidae_Hypleurochilus_sp_E00298:29.204243)79:8.849623)99:6.349519)80:3.73624)100:20.965339)97:7.552014)39:2.350688)90:1.703449,(Opistognathidae_Opistognathus_maxillosus_E00207:34.112682,(Opistognathidae_Opistognathus_aurifrons_E00216:26.780146,Opistognathidae_Lonchopisthus_micrognathus_E00603:26.780146)96:7.332536)100:46.598433)97:2.009755)97:4.119093,(Pseudochromidae_Pseudoplesiops_revellei_E00745:62.444111,((Pseudochromidae_Pholidochromis_cerasina_G01436:21.946123,(Pseudochromidae_Pseudochromis_fridmani_N26709:15.810742,(Pseudochromidae_Pseudochromis_cyanotaenia_E00706:13.971691,Pseudochromidae_Pseudochromis_jamesi_E00535:13.971691)64:1.839051)99:6.135381)99:5.221361,(Pseudochromidae_Labracinus_cyclophthalmus_G01343:24.899155,Pseudochromidae_Ogilbyina_novaehollandiae_G01403:24.899155)58:2.268328)100:35.276627)81:24.395852)42:1.249499)38:1.067386)70:2.481885)40:2.181177)26:0.714277,((Ambassidae_Parambassis_ranga_N01735:4.270224,Ambassidae_Ambassis_urotaenia_G01197:4.270224)100:43.531296,(Ambassidae_Ambassis_interrupta_E01100:38.283633,Ambassidae_Ambassis_agrammus_G01196:38.283633)100:9.517887)100:46.732667)36:1.990571)97:13.228326,(((((Polynemidae_Leptomelanosoma_indicum_E00842:17.487188,((Polynemidae_Eleutheronema_tetradactylum_E01154:4.778348,Polynemidae_Eleutheronema_rhadinum_N26015:4.778348)100:11.668853,Polynemidae_Polydactylus_sextarius_N26043:16.447201)73:1.039987)53:2.270592,(Polynemidae_Polydactylus_octonemus_E00606:1.430854,Polynemidae_Polydactylus_virginicus_E00217:1.430854)100:18.326926)100:45.718365,((Lactariidae_Lactarius_lactarius_Qatar_M01593:13.515875,Lactariidae_Lactarius_lactarius_Fiji_M01673:13.515875)100:44.961905,Menidae_Mene_maculata_E01131:58.47778)35:6.998365)36:5.450166,((((Sphyraenidae_Sphyraena_japonica_N30022:20.987078,(Sphyraenidae_Sphyraena_argentea_E00230:16.252276,Sphyraenidae_Sphyraena_sphyraena_E01143:16.252276)100:4.734802)100:18.310886,(Sphyraenidae_Sphyraena_putnamae_E00955:18.16154,(Sphyraenidae_Sphyraena_jello_N30023:10.325189,Sphyraenidae_Sphyraena_barracuda_E00836:10.325189)100:7.836351)100:21.136424)100:29.502036,((((Centropomidae_Centropomus_undecimalis_E00194:19.220214,(Centropomidae_Centropomus_viridis_E01153:11.956227,(Centropomidae_Centropomus_medius_E01158:10.239103,Centropomidae_Centropomus_ensiferus_E00766:10.239103)89:1.717124)96:7.263987)100:32.679786,(Centropomidae_Psammoperca_waigiensis_E01148:29.501759,(Centropomidae_Lates_calcarifer_E01135:12.891121,(Centropomidae_Lates_microlepis_E01149:9.72896,Centropomidae_Lates_japonicus_E01147:9.72896)92:3.162161)100:16.610637)100:22.398241)61:7.333119,((Psettodidae_Psettodes_erumei_E01165:10.961023,Psettodidae_Psettodes_belcheri_E01180:10.961023)100:46.886561,(((Citharidae_Citharoides_macrolepis_E00071:18.859124,Citharidae_Citharus_linguatula_E01174:18.859124)100:22.98215,Citharidae_Lepidoblepharon_ophthalmolepis_E00080:41.841274)100:11.758726,((((((Rhombosoleidae_Neoachiropsetta_milfordi_E01170:0.757566,Rhombosoleidae_Mancopsetta_maculata_E01169:0.757566)100:22.329687,(Rhombosoleidae_Rhombosolea_leporina_E01166:4.546122,(Rhombosoleidae_Rhombosolea_tapirina_E01168:1.367799,Rhombosoleidae_Rhombosolea_plebeia_E01167:1.367799)100:3.178323)100:18.541131)100:11.055678,Rhombosoleidae_Oncopterus_darwinii_E01184:34.142931)100:12.180451,(Scophthalmidae_Scophthalmus_maximus_E01161:27.118137,(Scophthalmidae_Lepidorhombus_boscii_E00462:23.194357,Scophthalmidae_Scophthalmus_aquosus_E00039:23.194357)62:3.92378)100:19.205245)68:4.103837,((((Bothidae_Chascanopsetta_lugubris_E01181:18.100633,((Bothidae_Bothus_robinsi_E00038:13.333978,Bothidae_Bothus_lunatus_E00007:13.333978)100:4.35584,((Bothidae_Asterorhombus_cocosensis_E00904:15.80396,(Bothidae_Psettina_tosana_E00083:12.907937,(Bothidae_Arnoglossus_blachei_E01160:7.327853,Bothidae_Arnoglossus_imperialis_E01163:7.327853)100:5.580084)94:2.896023)60:1.13053,(Bothidae_Trichopsetta_ventralis_E00599:14.049713,Bothidae_Monolene_sp_E01172:14.049713)58:2.884777)46:0.755328)53:0.410815)65:0.699367,Bothidae_Laeops_kitaharae_E00082:18.8)100:22.253078,(Cyclopsettidae_Paralichthys_dentatus_N24591:34.946828,((Cyclopsettidae_Syacium_micrurum_E00633:13.62694,Cyclopsettidae_Cyclopsetta_chittendeni_E00597:13.62694)100:17.797972,(((Cyclopsettidae_Etropus_crossotus_E00647:11.216056,Cyclopsettidae_Etropus_microstomus_E00047:11.216056)85:3.576297,Cyclopsettidae_Citharichthys_arctifrons_E00043:14.792354)83:2.677589,Cyclopsettidae_Citharichthys_sordidus_E00446:17.469943)100:13.954969)100:3.521916)95:6.10625)95:4.583692,((Paralichthyidae_Xystreurys_liolepis_E00021:17.66483,((Paralichthyidae_Pseudorhombus_pentophthalmus_E00077:15.254365,(Paralichthyidae_Ancylopsetta_ommata_E00001:3.897405,Paralichthyidae_Gastropsetta_frontalis_E00640:3.897405)100:11.35696)40:0.805806,(Paralichthyidae_Paralichthys_albigutta_E01171:8.609394,Paralichthyidae_Paralichthys_californicus_E00020:8.609394)99:7.450777)57:1.604659)97:4.357739,((Pleuronectidae_Hypsopsetta_guttulata_E00022:17.16562,(((Pleuronectidae_Hippoglossoides_elassodon_E00424:3.816943,Pleuronectidae_Limanda_limanda_E00690:3.816943)100:3.537394,(Pleuronectidae_Pseudopleuronectes_americanus_E00035:6.526788,(((Pleuronectidae_Isopsetta_isolepis_E00018:3.728653,(Pleuronectidae_Parophrys_vetulus_E00445:2.879344,Pleuronectidae_Psettichthys_melanostictus_E00025:2.879344)74:0.849309)62:0.226015,Pleuronectidae_Lepidopsetta_bilineata_E00438:3.954668)100:1.77526,(Pleuronectidae_Pleuronectes_platessa_E00053:3.276845,Pleuronectidae_Platichthys_stellatus_E00026:3.276845)100:2.453083)98:0.79686)94:0.827548)100:2.417646,((Pleuronectidae_Glyptocephalus_zachirus_E00416:5.499925,(Pleuronectidae_Microstomus_pacificus_E00433:3.75823,Pleuronectidae_Embassichthys_bathybius_E00064:3.75823)100:1.741695)100:2.338481,(Pleuronectidae_Lyopsetta_exilis_E01173:6.442751,(Pleuronectidae_Hippoglossus_hippoglossus_E00689:5.270927,Pleuronectidae_Eopsetta_jordani_E00444:5.270927)73:1.171825)52:1.395655)78:1.933577)100:7.393637)97:3.219248,Pleuronectidae_Atheresthes_evermanni_E00055:20.384867)39:1.637702)97:23.614201)99:4.790449)64:1.697667,((Achiridae_Trinectes_maculatus_E00046:21.004454,((Achiridae_Gymnachirus_melas_E00609:0.936686,Achiridae_Gymnachirus_texae_E00630:0.936686)100:16.819648,(Achiridae_Hypoclinemus_sp_E01162:13.352802,Achiridae_Achirus_lineatus_E00605:13.352802)100:4.403532)99:3.24812)100:29.635061,((Samaridae_Plagiopsetta_glossa_E00074:10.009471,((Samaridae_Samariscus_latus_N27771:1.567467,Samaridae_Samariscus_japonicus_E00072:1.567467)100:3.761849,Samaridae_Samariscus_xenicus_E00078:5.329316)100:4.680155)100:39.163758,((Poecilopsettidae_Poecilopsetta_beanii_E00448:1.425604,Poecilopsettidae_Poecilopsetta_plinthus_E00073:1.425604)100:44.469952,(((Cynoglossidae_Symphurus_atricaudus_E00023:13.982857,(Cynoglossidae_Symphurus_civitatium_E00604:2.467634,Cynoglossidae_Symphurus_plagiusa_E01164:2.467634)100:11.515223)100:23.773487,Cynoglossidae_Cynoglossus_interruptus_E00076:37.756344)100:4.643656,((Soleidae_Aseraggodes_kobensis_E00075:17.096844,Soleidae_Aseraggodes_heemstrai_E00582:17.096844)100:16.22614,(((Soleidae_Pegusa_lascaris_E01183:11.410074,Soleidae_Solea_solea_E00054:11.410074)96:3.517322,Soleidae_Microchirus_frechkopi_E01175:14.927395)100:11.053855,(Soleidae_Heteromycteris_japonicus_E00079:22.824613,(Soleidae_Brachirus_annularis_E01182:10.13196,(Soleidae_Pseudaesopia_japonica_E00081:4.442881,Soleidae_Soleichthys_heterorhinos_E00943:4.442881)100:5.689079)100:12.692653)62:3.156637)100:7.341733)100:9.077016)97:3.495556)95:3.277673)96:1.466287)64:1.48537)99:1.475114)99:4.247584)21:1.385535)16:3.176567,((((Carangidae_Oligoplites_saurus_E00195:22.731765,Carangidae_Scomberoides_lysan_E00738:22.731765)100:17.449856,(Carangidae_Trachinotus_ovatus_E01145:11.485324,(Carangidae_Trachinotus_falcatus_E00819:8.633469,Carangidae_Trachinotus_carolinus_G01504:8.633469)78:2.851855)100:28.696297)100:12.235205,((Carangidae_Elagatis_bipinnulata_E00841:35.578476,(Carangidae_Seriola_dumerili_E00623:4.436756,Carangidae_Seriola_rivoliana_E00467:4.436756)100:31.141721)100:14.421524,((Carangidae_Atule_mate_E00942:24.756963,((Carangidae_Trachurus_lathami_E00598:13.968867,(Carangidae_Decapterus_macarellus_E00212:11.650059,Carangidae_Decapterus_punctatus_E00671:11.650059)91:2.318808)96:4.843464,Carangidae_Selar_crumenophthalmus_E00833:18.812332)100:5.944631)90:4.349211,((Carangidae_Gnathanodon_speciosus_E00938:20.273957,((Carangidae_Caranx_crysos_ruber_E00510:11.938464,(Carangidae_Caranx_sexfasciatus_E00834:6.459381,Carangidae_Caranx_ignobilis_E00574:6.459381)100:5.479082)100:6.938299,(Carangidae_Hemicaranx_amblyrhynchus_E00616:14.391153,Carangidae_Chloroscombrus_chrysurus_E00763:14.391153)100:4.485609)69:1.397194)70:3.286617,((Carangidae_Carangoides_ferdau_E00869:12.560655,Carangidae_Uraspis_secunda_E00515:12.560655)100:4.29535,(Carangidae_Carangoides_plagiotaenia_E00917:14.49025,(Carangidae_Alectis_ciliaris_E00469:12.994135,(Carangidae_Selene_setapinnis_N01705:4.822452,Carangidae_Selene_brownii_E00767:4.822452)100:8.171683)94:1.496115)98:2.365755)100:6.704569)70:5.5456)100:20.893826)100:2.416826)100:4.697302,((Leptobramidae_Leptobrama_muelleri_E01150:46.648376,(Toxotidae_Toxotes_chatareus_E01139:6.157966,Toxotidae_Toxotes_jaculatrix_E01155:6.157966)100:40.49041)66:4.550888,(Xiphiidae_Xiphias_gladius_E01151:27.72382,(Istiophoridae_Kajikia_albida_E00681:5.263366,((Istiophoridae_Istiophorus_platypterus_E00695:4.23715,Istiophoridae_Tetrapturus_angustirostris_N01741:4.23715)81:0.569418,(Istiophoridae_Makaira_sp_E00692:0.401796,Istiophoridae_Makaira_nigricans_E00697:0.401796)100:4.404772)68:0.456798)100:22.460455)100:23.475444)58:5.914864)76:5.295558)12:6.390313)5:0.6,(Nematistiidae_Nematistius_pectoralis_E01146:59.807772,((Rachycentridae_Rachycentron_canadum_E00468:19.11188,Coryphaenidae_Coryphaena_hippurus_E00937:19.11188)100:12.78812,(Echeneidae_Remora_osteochir_australis_E00503:10.853505,(Echeneidae_Phtheirichthys_lineatus_G01438:1.29844,(Echeneidae_Echeneis_neucratoides_E00245:0.590862,Echeneidae_Echeneis_naucrates_E00615:0.590862)93:0.707578)100:9.555065)100:21.046495)100:27.907772)17:9.592228)6:1.526311)99:25.473689,((((Indostomidae_Indostomus_paradoxus_E01156:2.732836,Indostomidae_Indostomus_crocodilus_N17863:2.732836)100:67.135119,Synbranchidae_Monopterus_albus_E01134:69.867954)95:4.498603,(Mastacembelidae_Macrognathus_siamensis_G01367:19.386195,((Mastacembelidae_Mastacembelus_cunningtoni_N20638:2.612977,Mastacembelidae_Mastacembelus_brachyrhinus_N01727:2.612977)99:4.965782,(Mastacembelidae_Mastacembelus_erythrotaenia_E01157:7.55627,Mastacembelidae_Mastacembelus_niger_N20658:7.55627)38:0.022489)98:11.807437)100:54.980363)100:6.333442,(((Pristolepididae_Pristolepis_sp_N36627:14.953783,Pristolepididae_Pristolepis_fasciata_N26580:14.953783)100:51.627573,((Badidae_Badis_pyema_N03996:40.146658,Badidae_Dario_dario_N04003:40.146658)100:7.311848,((Nandidae_Nandus_andrewi_N22312:1.111972,Nandidae_Nandus_nandus_G01388:1.111972)100:12.018047,Nandidae_Nandus_nebulosus_N22314:13.130019)100:34.328488)100:19.122849)91:4.476511,(((Anabantidae_Ctenopoma_acutirostre_kingsleyae_E01141:33.599875,Anabantidae_Microctenopoma_nanum_G01373:33.599875)100:28.677095,(Helostomatidae_Helostoma_temminkii_G01315:59.316487,(Osphronemidae_Betta_splendens_G01226:46.069086,Osphronemidae_Trichopodus_pectoralis_N24415:46.069086)100:13.247401)98:2.960483)100:6.861962,(Channidae_Channa_lucius_N06615:36.065656,(Channidae_Channa_striata_E01133:16.174025,Channidae_Channa_melasoma_N06621:16.174025)100:19.891631)100:33.073276)82:1.918935)100:9.642133)100:15.7)99:13.353085)94:4.840621,((((((((((Percichthyidae_Maccullochella_peelii_G01365:48.500198,Percichthyidae_Gadopsis_marmoratus_E01144:48.500198)66:3.417642,((Percichthyidae_Percichthys_trucha_G01430:19.264315,Percichthyidae_Percilia_irwini_N24981:19.264315)100:24.209534,(Percichthyidae_Macquaria_ambigua_G01366:39.54272,Percichthyidae_Nannoperca_australis_G01389:39.54272)97:3.931129)100:8.443991)100:17.78216,((((Sinipercidae_Coreoperca_whiteheadi_G01264:41.676848,(Sinipercidae_Siniperca_chuatsi_E01136:9.677837,Sinipercidae_Siniperca_scherzeri_G01489:9.677837)100:31.999011)97:10.263432,Enoplosidae_Enoplosus_armatus_G01287:51.94028)69:10.459576,((Elassomatidae_Elassoma_okefenokee_G01283:12.673216,(Elassomatidae_Elassoma_zonatum_G01284:8.192724,Elassomatidae_Elassoma_evergladei_E00146:8.192724)100:4.480492)100:36.426784,((((Centrarchidae_Lepomis_cyanellus_E00132:11.732997,Centrarchidae_Lepomis_macrochirus_E01113:11.732997)100:14.323088,Centrarchidae_Micropterus_salmoides_E01110:26.056085)99:4.127337,(Centrarchidae_Pomoxis_nigromaculatus_E00131:16.7,(Centrarchidae_Ambloplites_rupestris_E00392:15.376337,Centrarchidae_Archoplites_interruptus_N01722:15.376337)63:1.323663)100:13.483423)99:5.643494,Centrarchidae_Acantharchus_pomotis_G01185:35.826917)100:13.273083)100:13.299856)93:6.642419,(((Cirrhitidae_Amblycirrhitus_pinos_E00314:36.212309,Cirrhitidae_Paracirrhites_forsteri_arcatus_E00924:36.212309)61:5.134374,((Cirrhitidae_Cirrhitichthys_falco_N09466:21.207119,Cirrhitidae_Cirrhitichthys_oxycephalus_E00884:21.207119)100:12.540662,Cirrhitidae_Neocirrhites_armatus_E00725:33.747781)100:7.598902)100:25.573855,(((Cheilodactylidae_Cheilodactylus_variegatus_N07699:12.499409,(Cheilodactylidae_Chirodactylus_brachydactylus_E00796:4.18006,Cheilodactylidae_Chirodactylus_jessicalenorum_E00585:4.18006)100:8.319349)100:8.170721,(Latridae_Latris_lineata_M01595:0.725056,Latridae_Latridopsis_forsteri_M01594:0.725056)100:19.945074)100:17.389384,((Cheilodactylidae_Cheilodactylus_fasciatus_E00795:10.825201,Cheilodactylidae_Cheilodactylus_pixi_E00797:10.825201)100:25.384953,((Chironemidae_Chironemus_georgianus_M01569:16.981127,Chironemidae_Chironemus_maculosus_M01570:16.981127)100:17.105798,(Aplodactylidae_Aplodactylus_etheridgii_M01537:12.350987,Aplodactylidae_Aplodactylus_arctidens_M01536:12.350987)100:21.735938)70:2.123229)54:1.84936)100:28.861025)97:2.121737)56:0.657725)99:3.887799,(Percalatidae_Macquaria_novemaculeata_G01432:6.975969,Percalatidae_Macquaria_colonorum_G01431:6.975969)100:66.611831)90:7.287308,(Girellidae_Girella_nigricans_mezina_E00197:68.898253,(Dichistiidae_Dichistius_capensis_M01571:66.28397,((Oplegnathidae_Oplegnathus_punctatus_G01405:57.530619,(Kuhliidae_Kuhlia_mugil_E00712:19.398865,(Kuhliidae_Kuhlia_rupestris_E00957:17.760242,Kuhliidae_Kuhlia_marginata_G01341:17.760242)38:1.638622)100:38.131754)70:6.664179,((Terapontidae_Terapon_jarbua_E00826:30.031204,(Terapontidae_Scortum_barcoo_G01480:9.193232,Terapontidae_Hephaestus_fuliginosus_G01318:9.193232)100:20.837972)100:30.672553,((Kyphosidae_Kyphosus_incisor_E00202:9.204075,(Kyphosidae_Kyphosus_elegans_G01342:5.56658,Kyphosidae_Kyphosus_cinerascens_N17975:5.56658)78:3.637494)100:7.231625,Kyphosidae_Kyphosus_sectatrix_E00775:16.4357)100:44.268057)52:3.491041)67:2.089172)67:2.614283)99:11.976855)98:11.863128,(((((Howellidae_Howella_brodiei_E00816:26.69732,Howellidae_Howella_zina_N17756:26.69732)72:48.794634,Ostracoberycidae_Ostracoberyx_dorygenys_N24448:75.491954)2:0.172859,Acropomatidae_Acropoma_japonicum_G01188:75.664813)26:6.520388,((Epigonidae_Epigonus_pandionis_E01019:25.972795,Epigonidae_Epigonus_telescopus_E00652:25.972795)99:37.337833,Symphysanodontidae_Symphysanodon_typus_M01725:63.310628)20:18.874572)29:6.211334,((((((Banjosidae_Banjos_banjos_N01542:0.907846,Banjosidae_Banjos_banjos_M01542:0.907846)100:42.833829,((Pentacerotidae_Pentaceros_pectoralis_N01736:18.14568,(Pentacerotidae_Pentaceros_japonicus_N24735:12.332041,Pentacerotidae_Pentaceros_wheeleri_N01737:12.332041)54:5.81364)100:19.18175,((Pentacerotidae_Zanclistius_elevatus_M01631:18.032817,Pentacerotidae_Paristiopterus_labiosus_M01629:18.032817)100:15.669106,Pentacerotidae_Histiopterus_typus_N24730:33.701923)82:3.625507)98:6.414245)94:12.400627,(Polyprionidae_Stereolepis_gigas_E00227:39.585891,(Polyprionidae_Polyprion_americanus_E00242:9.384866,Polyprionidae_Polyprion_oxygeneios_M01632:9.384866)99:30.201025)50:16.556411)16:7.887628,Bathyclupeidae_Bathyclupea_argentea_M01543:64.02993)24:16.613691,(Acropomatidae_Synagrops_bellus_E01125:35.071016,Acropomatidae_Synagrops_spinosus_E01123:35.071016)100:45.572605)18:6.498918,((Acropomatidae_Malakichthys_elegans_N01922:75.045889,Lateolabracidae_Lateolabrax_japonicus_E01130:75.045889)25:11.063793,(((Creediidae_Limnichthys_sp_E01081:65.76094,Percophidae_Acanthaphritis_unoorum_N24985:65.76094)71:14.607952,Champsodontidae_Champsodon_snyderi_N06574:80.368891)23:4.304529,((Glaucosomatidae_Glaucosoma_hebraicum_G01300:9.988874,Glaucosomatidae_Glaucosoma_buergeri_N15231:9.988874)100:56.293275,(Pempheridae_Parapriacanthus_ransonneti_E00923:45.150327,(Pempheridae_Pempheris_schomburgkii_E00213:33.726866,((Pempheridae_Pempheris_schwenkii_N01628:9.255409,Pempheridae_Pempheris_vanicolensis_E00886:9.255409)27:6.124166,Pempheridae_Pempheris_oualensis_E00718:15.379575)80:18.347291)99:11.423461)100:21.131822)100:18.391272)16:1.436262)3:1.032856)9:1.253996)33:4.341701)25:2.161765,(((((Serranidae_Odontanthias_chrysostictus_G01327:30.601022,(Serranidae_Baldwinella_aureorubens_G01220:20.897614,(Serranidae_Baldwinella_vivana_E00338:12.874716,(Serranidae_Anthias_nicholsi_E00447:8.319789,Serranidae_Pronotogrammus_martinicensis_E00636:8.319789)89:4.554927)94:8.022899)99:9.703408)63:4.680033,(Serranidae_Pseudanthias_pascalus_G01452:28.174228,Serranidae_Pseudanthias_squamipinnis_E00860:28.174228)86:7.106827)100:40.464096,(Serranidae_Centropristis_striata_E00163:48.872091,(Serranidae_Paralabrax_nebulifer_E00325:38.925766,((Serranidae_Serranus_baldwini_E00322:26.956874,Serranidae_Serranus_tigrinus_G01486:26.956874)100:9.925104,(Serranidae_Hypoplectrus_puella_E00505:28.505604,((Serranidae_Diplectrum_formosum_E01002:0.730346,Serranidae_Diplectrum_bivittatum_E01008:0.730346)100:22.781525,(Serranidae_Serranus_notospilus_E00337:6.182521,Serranidae_Serranus_phoebe_E00336:6.182521)100:17.32935)87:4.993733)100:8.376374)98:2.043789)100:9.946325)99:26.87306)63:4.181302,((Serranidae_Liopropoma_mowbrayi_E00307:8.076665,Serranidae_Liopropoma_rubre_E00306:8.076665)100:62.574297,(((Serranidae_Pseudogramma_polyacantha_E00852:21.040811,Serranidae_Aporops_bilinearis_E00531:21.040811)100:26.201437,((Serranidae_Grammistes_sexlineatus_E00900:23.510836,Serranidae_Grammistops_ocellatus_E00571:23.510836)79:2.772294,(Serranidae_Rypticus_subbifrenatus_E00347:11.50159,Serranidae_Rypticus_saponaceus_E00764:11.50159)100:14.781541)100:20.959118)100:17.546341,(Serranidae_Aethaloperca_rogaa_E01079:31.910215,((Serranidae_Hyporthodus_flavolimbatus_E00627:17.834564,(Serranidae_Mycteroperca_bonaci_microlepis_E00311:15.23927,(Serranidae_Epinephelus_maculatus_E00549:10.857638,Serranidae_Epinephelus_merra_E00552:10.857638)100:4.381632)100:2.595294)100:11.775832,(Serranidae_Cephalopholis_fulva_E00771:21.356509,(Serranidae_Cephalopholis_miniata_E00838:15.888522,Serranidae_Cephalopholis_argus_E00868:15.888522)88:5.467987)95:8.253886)48:2.299819)100:32.878375)85:5.862372)83:9.275491)64:2.273547,(((((((Bembropidae_Bembrops_gobioides_E01128:4.259796,Bembropidae_Bembrops_anatirostris_E01120:4.259796)100:58.815169,((Triglidae_Pterygotrigla_hemisticta_N31939:41.833989,(Triglidae_Bellator_militaris_E01026:29.603168,((Triglidae_Prionotus_evolans_E01021:4.782809,Triglidae_Prionotus_stephanophrys_E00328:4.782809)100:13.422896,Triglidae_Prionotus_carolinus_E00340:18.205705)100:11.397463)100:12.230821)100:13.396135,(Peristediidae_Peristedion_ecuadorense_E00456:22.852066,(Peristediidae_Peristedion_gracile_E01029:9.188701,Peristediidae_Peristedion_truncatum_E00450:9.188701)99:13.663365)100:32.378058)100:7.844841)68:4.637499,(((((Scorpaenidae_Scorpaenodes_albaiensis_E00532:25.670962,((Scorpaenidae_Dendrochirus_zebra_E00897:8.229092,(Scorpaenidae_Pterois_radiata_E00850:4.386129,Scorpaenidae_Pterois_antennata_E00705:4.386129)100:3.842963)88:4.052867,Scorpaenidae_Pterois_miles_E00882:12.281959)100:13.389003)40:1.873814,Scorpaenidae_Scorpaenodes_guamensis_E00870:27.544776)100:14.547687,(((Sebastidae_Helicolenus_dactylopterus_E00044:13.276487,((Sebastidae_Sebastes_paucispinis_E00354:7.11907,Sebastidae_Sebastes_jordani_E00350:7.11907)86:1.132541,((Sebastidae_Sebastes_aurora_E00349:2.703069,Sebastidae_Sebastes_diploproa_E00432:2.703069)72:0.708948,(Sebastidae_Sebastes_ruberrimus_N28709:2.990073,Sebastidae_Sebastes_fasciatus_G01482:2.990073)59:0.421944)63:4.839594)100:5.024876)100:17.424092,(Sebastidae_Adelosebastes_latens_E00066:4.126537,Sebastidae_Sebastolobus_alascanus_E00417:4.126537)100:26.574041)100:6.625591,(Setarchidae_Setarches_guentheri_E01035:31.541304,(Scorpaenidae_Neomerinthe_hemingwayi_E00619:20.073602,(Scorpaenidae_Pontinus_rathbuni_E00463:3.883507,Scorpaenidae_Pontinus_longispinis_E01010:3.883507)100:16.190095)100:11.467703)73:5.784866)59:4.766293)55:6.592159,((Scorpaenidae_Iracundus_signifer_E00583:27.050401,(Scorpaenidae_Sebastapistes_cyanostigma_E00888:23.903199,(Scorpaenidae_Caracanthus_unipinna_E00558:6.323564,Scorpaenidae_Caracanthus_maculatus_E00716:6.323564)100:17.579635)91:3.147202)83:2.817517,((Scorpaenidae_Taenianotus_triacanthus_E00866:24.109106,(Scorpaenidae_Scorpaenopsis_oxycephala_E00581:17.850101,Scorpaenidae_Scorpaenopsis_longispina_E00903:17.850101)95:6.259005)92:3.265876,((Scorpaenidae_Scorpaena_agassizii_E01038:16.458945,Scorpaenidae_Scorpaena_brasiliensis_E00759:16.458945)99:4.98243,(Scorpaenidae_Scorpaena_guttata_E00291:8.373067,Scorpaenidae_Scorpaena_dispar_E00512:8.373067)100:13.068308)97:5.933607)87:2.492935)100:18.816705)100:14.596818,(Synanceiidae_Synanceia_verrucosa_E00867:22.729986,Tetrarogidae_Coccotropsis_gymnoderma_E00801:22.729986)100:40.551455)72:4.431024)58:3.740283,(Anoplopomatidae_Anoplopoma_fimbria_E00423:47.363689,((Bathymasteridae_Rathbunella_hypoplecta_E00128:24.288698,((Bathymasteridae_Bathymaster_signatus_E00420:5.44854,Bathymasteridae_Bathymaster_caeruleofasciatus_E00191:5.44854)100:13.743487,(Stichaeidae_Cebidichthys_violaceus_N30217:16.300999,(Stichaeidae_Bryozoichthys_marjorius_E00442:14.997128,((Zaproridae_Zaprora_silenus_E00362:11.569241,(Cryptacanthodidae_Cryptacanthodes_maculatus_E00116:9.185136,(Stichaeidae_Poroclinus_rothrocki_E00431:8.480446,((Stichaeidae_Lumpenus_fabricii_E00361:2.662486,Stichaeidae_Lumpenus_lampretaeformis_E00371:2.662486)100:3.647924,Stichaeidae_Leptoclinus_maculatus_E00323:6.310409)94:2.170037)64:0.70469)90:2.384105)81:1.66135,(((Anarhichadidae_Anarrhichthys_ocellatus_E00119:4.921418,(Anarhichadidae_Anarhichas_denticulatus_E00787:2.580948,Anarhichadidae_Anarhichas_orientalis_lupus_E00117:2.580948)100:2.340471)100:2.719562,(Pholidae_Pholis_ornata_N01732:2.281334,Pholidae_Pholis_crassispina_G01437:2.281334)100:5.359646)71:4.398388,(Zoarcidae_Zoarces_americanus_viviparus_E00370:9.022593,(((Zoarcidae_Lycodes_diapterus_G01364:6.036472,((Zoarcidae_Melanostigma_pammelas_E00365:4.247834,(Zoarcidae_Lycodes_brevipes_E00413:3.129729,Zoarcidae_Lycodes_terraenovae_E00675:3.129729)51:1.118105)63:1.264998,(Zoarcidae_Lycodapus_mandibularis_E00355:4.027385,Zoarcidae_Bothrocara_brunneum_E00357:4.027385)65:1.485447)32:0.52364)14:0.654182,Zoarcidae_Lycenchelys_crotalinus_E00425:6.690654)10:0.371634,(Zoarcidae_Bothrocara_hollandi_N01721:7.038993,Zoarcidae_Eucryphycus_californicus_E00327:7.038993)1:0.023296)96:1.960305)100:3.016775)65:1.191223)93:1.766537)59:1.303871)100:2.891029)89:5.09667)100:17.925505,((((Gasterosteidae_Pungitius_pungitius_G01460:16.239449,(Gasterosteidae_Gasterosteus_wheatlandi_N15128:8.769224,Gasterosteidae_Gasterosteus_aculeatus_E01012:8.769224)100:7.470224)100:4.919373,(Gasterosteidae_Culaea_inconstans_E00368:19.516862,(Gasterosteidae_Apeltes_quadracus_E00791:16.170116,Gasterosteidae_Spinachia_spinachia_G01491:16.170116)100:3.346746)99:1.641959)100:5.141179,(Aulorhynchidae_Aulorhynchus_flavidus_G01217:25.209713,(Hypoptychidae_Aulichthys_japonicus_G01216:22.397283,Hypoptychidae_Hypoptychus_dybowskii_G01335:22.397283)76:2.81243)49:1.090287)100:14.023168,(Zaniolepididae_Zaniolepis_frenata_E00353:34.272915,(((Hexagrammidae_Hexagrammos_decagrammus_E00348:5.067118,Hexagrammidae_Hexagrammos_lagocephalus_otakii_E00363:5.067118)100:6.393473,Hexagrammidae_Pleurogrammus_monopterygius_E00367:11.460591)100:16.731444,((Trichodontidae_Trichodon_trichodon_N31563:22.484053,((Cyclopteridae_Eumicrotremus_orbis_E00270:9.150077,Cyclopteridae_Cyclopterus_lumpus_E00220:9.150077)100:11.101715,((Liparidae_Liparis_pulchellus_E00225:7.963738,Liparidae_Liparis_gibbus_E00224:7.963738)100:3.569875,((Liparidae_Careproctus_melanurus_E00422:6.031385,Liparidae_Careproctus_rastrinus_E00255:6.031385)91:3.454728,(Liparidae_Rhinoliparis_barbulifer_E00262:7.133838,((Liparidae_Paraliparis_hystrix_E00454:4.783015,Liparidae_Paraliparis_beani_E00458:4.783015)77:1.453857,Liparidae_Paraliparis_copei_E00453:6.236871)64:0.896967)75:2.352275)100:2.0475)100:8.718179)100:2.232262)100:2.315947,((((Psychrolutidae_Radulinus_asprellus_E00429:13.841604,Psychrolutidae_Gymnocanthus_galeatus_E00259:13.841604)32:2.664471,(((Psychrolutidae_Triglops_scepticus_E00421:8.071129,Psychrolutidae_Triglops_macellus_E00435:8.071129)97:7.422432,(Psychrolutidae_Artediellus_uncinatus_N10447:14.133753,(Psychrolutidae_Dasycottus_setiger_E00288:12.689368,((Psychrolutidae_Malacocottus_zonurus_E00253:11.025451,Psychrolutidae_Psychrolutes_phrictus_E00276:11.025451)7:0.733866,Psychrolutidae_Cottunculus_thomsonii_E00963:11.759316)93:0.930051)93:1.444386)60:1.359807)56:0.701432,(((Psychrolutidae_Chitonotus_pugetensis_E00233:11.921926,(Psychrolutidae_Icelinus_filamentosus_E00277:3.788092,Psychrolutidae_Icelinus_quadriseriatus_E00228:3.788092)100:8.133834)80:1.358782,Psychrolutidae_Rastrinus_scutiger_E00256:13.280709)92:2.072518,(Psychrolutidae_Enophrys_taurina_E00234:9.311026,((Psychrolutidae_Microcottus_sellaris_E00223:4.168379,Psychrolutidae_Myoxocephalus_polyacanthocephalus_E00267:4.168379)50:2.683088,Psychrolutidae_Myoxocephalus_octodecemspinosus_E00221:6.851467)50:2.459559)82:6.042201)27:0.841765)19:0.311083)80:1.943115,(Cottidae_Cottus_carolinae_E00281:14.176177,Cottidae_Leptocottus_armatus_E00266:14.176177)95:4.273013)88:2.352519,(Scorpaenichthyidae_Scorpaenichthys_marmoratus_E00232:19.648962,((Agonidae_Hemilepidotus_zapus_E00272:3.460008,Agonidae_Hemilepidotus_jordani_E00263:3.460008)100:13.427556,(Agonidae_Hypsagonus_quadricornis_E00269:13.264915,((Agonidae_Sarritor_frenatus_E00264:4.881886,Agonidae_Sarritor_leptorhynchus_E00254:4.881886)40:4.82912,(Agonidae_Aspidophoroides_monopterygius_N01986:8.3301,(Agonidae_Stellerina_xyosterna_N02010:6.999443,((Agonidae_Bathyagonus_pentacanthus_E00430:2.156707,Agonidae_Xeneretmus_latifrons_E00278:2.156707)86:1.651995,Agonidae_Bathyagonus_alascanus_E00268:3.808702)95:3.190741)78:1.330656)81:1.380906)65:3.553909)85:3.622648)99:2.761399)32:1.152747)99:3.998291)99:3.392035)99:6.08088)97:6.050253)70:1.891035)99:5.149486)100:24.089059)28:2.084335,(((Bembridae_Bembras_japonica_N01723:48.853071,Parabembridae_Parabembras_curtus_N24483:48.853071)96:19.61561,((Platycephalidae_Rogadius_asper_N25418:26.892841,(Platycephalidae_Thysanophrys_chiltonae_E00864:11.136282,Platycephalidae_Sunagocia_arenicola_E00708:11.136282)92:15.756559)100:20.801391,Platycephalidae_Platycephalus_indicus_N25405:47.694231)100:20.77445)28:2.860044,(Hoplichthyidae_Hoplichthys_gilberti_N17743:3.615809,Hoplichthyidae_Hoplichthys_langsdorfii_N17745:3.615809)100:67.712916)26:2.208357)67:2.372361,((Bovichtidae_Cottoperca_trigloides_G01267:30.394903,Bovichtidae_Bovichtus_diacanthus_G01229:30.394903)100:31.406196,(Pseudaphritidae_Pseudaphritis_urvillii_G01453:47.327406,(Eleginopsidae_Eleginops_maclovinus_G01286:29.115516,(Nototheniidae_Aethotaxis_mitopteryx_G01528:13.724479,(Nototheniidae_Dissostichus_eleginoides_G01279:13.019333,((Nototheniidae_Notothenia_coriiceps_G01526:11.088584,((Bathydraconidae_Gymnodraco_acuticeps_E00155:7.126837,(Bathydraconidae_Parachaenichthys_charcoti_E00157:6.638934,(Channichthyidae_Chionobathyscus_dewitti_G01250:1.909087,Channichthyidae_Chionodraco_rastrospinosus_E00156:1.909087)100:4.729847)47:0.487903)85:0.862694,(Harpagiferidae_Harpagifer_antarcticus_G01524:6.675692,(Artedidraconidae_Artedidraco_orianae_G01525:2.130318,Artedidraconidae_Pogonophryne_barsukovi_E00158:2.130318)100:4.545373)92:1.31384)100:3.099053)82:1.26365,(Nototheniidae_Gobionotothen_gibberifrons_G01529:11.286838,(Nototheniidae_Pagothenia_borchgrevinki_G01527:6.77443,Nototheniidae_Patagonotothen_tessellata_G01530:6.77443)100:4.512408)89:1.065396)64:0.667099)52:0.705146)100:15.391037)100:18.211889)100:14.473694)100:14.108344)75:2.193633,(Niphonidae_Niphon_spinosus_G01398:64.396365,(((Percidae_Gymnocephalus_schraetser_E00141:11.170664,Percidae_Gymnocephalus_cernuus_E00140:11.170664)100:21.193358,((Percidae_Percina_caprodes_E01054:14.380268,(Percidae_Percina_nigrofasciata_E00154:12.512396,Percidae_Percina_phoxocephala_E00150:12.512396)92:1.867872)100:11.538348,((((Percidae_Etheostoma_zonale_E01111:14.025582,(Percidae_Etheostoma_atripinne_G01290:0.998824,Percidae_Etheostoma_simoterum_E00152:0.998824)100:13.026758)100:4.207817,Percidae_Etheostoma_vitreum_E00147:18.233399)98:4.051559,Percidae_Etheostoma_juliae_E00168:22.284958)100:2.748954,(Percidae_Crystallaria_asprella_E00153:21.408433,(Percidae_Ammocrypta_beanii_E00187:12.177549,(Percidae_Ammocrypta_pellucida_E00149:7.22084,Percidae_Ammocrypta_meridiana_E00148:7.22084)100:4.95671)100:9.230884)100:3.625478)61:0.884704)100:6.445406)100:6.60646,(((Percidae_Zingel_streber_E00144:11.440984,(Percidae_Zingel_zingel_E00142:9.127346,Percidae_Romanichthys_valsanicola_E00143:9.127346)62:2.313638)100:10.146863,Percidae_Sander_vitreus_E01109:21.587846)98:9.262438,(Percidae_Perca_flavescens_E00391:22.551745,Percidae_Perca_fluviatilis_G01428:22.551745)100:8.298539)100:8.120198)100:25.425883)99:13.706712)81:4.096923)93:12.7)31:4.678867,(((((((((((Cepolidae_Cepola_macrophthalma_M01566:14.736803,Cepolidae_Cepola_schlegelii_N06269:14.736803)97:13.301968,Cepolidae_Sphenanthias_tosaensis_N06282:28.03877)96:16.751471,Cepolidae_Acanthocepola_sp_M01669:44.790242)98:25.534357,((Priacanthidae_Heteropriacanthus_cruentatus_E00570:20.145366,Priacanthidae_Priacanthus_arenatus_E00618:20.145366)100:17.746561,Priacanthidae_Pristigenys_alta_E00252:37.891926)100:32.432673)98:7.717234,(Scatophagidae_Scatophagus_argus_E00051:15.64154,Scatophagidae_Selenotoca_multifasciata_G01483:15.64154)100:62.400293)73:3.857681,(((Caproidae_Antigonia_capros_E01024:10.883361,Caproidae_Antigonia_rubescens_N05907:10.883361)100:57.756757,Caproidae_Capros_aper_N05913:68.640118)37:12.159882,((((Antennariidae_Fowlerichthys_radiosus_E01124:30.81795,(Antennariidae_Histiophryne_cryptacanthus_G01326:27.462853,(Antennariidae_Antennatus_nummifer_E00587:11.993685,(Antennariidae_Histrio_histrio_E00643:10.9274,Antennariidae_Antennatus_coccineus_E01092:10.9274)66:1.066285)100:15.469169)95:3.355097)100:14.98205,((Ogcocephalidae_Halieutichthys_aculeatus_E01122:20.880959,(Ogcocephalidae_Dibranchus_tremendus_E00975:17.992937,(Ogcocephalidae_Ogcocephalus_radiatus_E00641:0.904343,Ogcocephalidae_Ogcocephalus_parvus_nasutus_E00610:0.904343)100:17.088594)53:2.888022)100:23.787212,(((Gigantactinidae_Gigantactis_sp_N34852:14.842499,(Gigantactinidae_Gigantactis_vanhoeffeni_E00177:6.593626,Gigantactinidae_Gigantactis_ios_E01053:6.593626)86:8.248873)100:18.604068,((Ceratiidae_Cryptopsaras_couesii_E00686:21.795516,(Ceratiidae_Ceratias_holboelli_E00175:3.066999,Ceratiidae_Ceratias_sp_E00160:3.066999)100:18.728517)100:9.461193,((Oneirodidae_Bertella_idiomorpha_E00386:16.297841,(Oneirodidae_Oneirodes_macrosteus_E00655:9.982154,(Oneirodidae_Dolopichthys_sp_E00484:4.060124,Oneirodidae_Oneirodes_bulbosus_E00176:4.060124)99:5.92203)100:6.315687)100:7.601304,(Himantolophidae_Himantolophus_albinares_sagamius_E00656:14.632261,(Melanocetidae_Melanocetus_murrayi_E00477:3.002188,Melanocetidae_Melanocetus_johnsonii_E00657:3.002188)100:11.630073)100:9.266884)100:7.357565)92:2.189858)100:5.254402,(Chaunacidae_Chaunax_suttkusi_E01117:5.339412,Chaunacidae_Chaunax_stigmaeus_E01121:5.339412)100:33.361558)100:5.967201)37:1.131829)100:19.405734,((Lophiidae_Lophius_gastrophysus_E01119:3.504816,Lophiidae_Lophius_americanus_E00578:3.504816)100:21.187299,Lophiidae_Lophiodes_reticulatus_E00625:24.692115)100:40.513619)100:15.259415,((Triodontidae_Triodon_macropterus_N31959:75.011571,((Triacanthidae_Triacanthus_biaculeatus_G01531:62.876664,((Triacanthodidae_Triacanthodes_anomalus_E00382:0.950896,Triacanthodidae_Triacanthodes_ethiops_G01532:0.950896)100:20.16446,Triacanthodidae_Halimochirurgus_alcocki_N31459:21.115356)100:41.761308)95:11.315172,(((Ostraciidae_Acanthostracion_quadricornis_E00760:23.844464,Ostraciidae_Rhinesomus_triqueter_G01469:23.844464)100:17.632088,Ostraciidae_Ostracion_cubicus_E00588:41.476552)100:13.323448,(Aracanidae_Anoplocapros_lenticularis_G01533:9.797423,Aracanidae_Aracana_aurita_G01205:9.797423)100:45.002577)100:19.391836)41:0.819735)67:2.788429,(((Diodontidae_Chilomycterus_schoepfii_E00517:12.60675,Diodontidae_Diodon_holocanthus_E00312:12.60675)100:43.29325,((Tetraodontidae_Tetractenos_hamiltoni_E00383:20.244149,Tetraodontidae_Takifugu_rubripes_E00460:20.244149)100:15.355851,(((Tetraodontidae_Sphoeroides_maculatus_E00339:3.538961,Tetraodontidae_Sphoeroides_nephelus_N01739:3.538961)100:29.489926,((Tetraodontidae_Canthigaster_bennetti_E00530:10.094281,(Tetraodontidae_Canthigaster_valentini_E00853:7.703014,Tetraodontidae_Canthigaster_jactator_N31165:7.703014)100:2.391267)100:14.189296,((Tetraodontidae_Arothron_nigropunctatus_N31143:7.446441,Tetraodontidae_Arothron_hispidus_E00985:7.446441)100:13.209457,((Tetraodontidae_Tetraodon_fluviatilis_E00374:0.959458,Tetraodontidae_Tetraodon_nigroviridis_G01513:0.959458)100:17.601101,Tetraodontidae_Tetraodon_miurus_N01740:18.560559)78:2.095339)77:3.627679)100:8.74531)74:1.652295,Tetraodontidae_Lagocephalus_laevigatus_E00601:34.681182)52:0.918818)100:20.3)100:17.542058,((Molidae_Ranzania_laevis_G01463:22,(Molidae_Mola_mola_E00683:9.03383,Molidae_Masturus_lanceolatus_E00651:9.03383)99:12.96617)100:46.702454,((Monacanthidae_Aluterus_scriptus_E00316:28.742251,((Monacanthidae_Oxymonacanthus_longirostris_E00914:26.186535,(Monacanthidae_Paraluteres_prionurus_E00913:21.952636,(Monacanthidae_Stephanolepis_hispidus_E00646:20.120579,(Monacanthidae_Pervagor_janthinosoma_N21229:15.676294,(Monacanthidae_Pervagor_nigrolineatus_N21232:14.769959,Monacanthidae_Acreichthys_tomentosus_N21168:14.769959)69:0.906335)100:4.444285)100:1.832057)100:4.233899)32:0.784209,(Monacanthidae_Amanses_scopas_E00536:11.733562,Monacanthidae_Cantherhines_pardalis_pullus_E00887:11.733562)100:15.237182)65:1.771507)100:15.057749,((Balistidae_Balistapus_undulatus_E00743:14.926601,((Balistidae_Melichthys_indicus_E00919:6.48228,Balistidae_Melichthys_niger_E00922:6.48228)100:6.162539,Balistidae_Balistoides_conspicillum_E00373:12.644819)97:2.281782)96:5.421236,((Balistidae_Pseudobalistes_flavimarginatus_N04225:11.485347,(Balistidae_Xanthichthys_ringens_N04239:3.919188,Balistidae_Xanthichthys_auromarginatus_E00380:3.919188)100:7.566159)100:8.268191,((Balistidae_Pseudobalistes_fuscus_E00524:16.401857,(Balistidae_Balistes_capriscus_E00591:10.639682,Balistidae_Balistes_vetula_E00755:10.639682)100:5.762174)73:2.029147,(((Balistidae_Rhinecanthus_verrucosus_N04231:3.295304,(Balistidae_Rhinecanthus_assasi_E00381:2.332082,Balistidae_Rhinecanthus_aculeatus_E00735:2.332082)100:0.963222)100:14.404696,(Balistidae_Sufflamen_chrysopterum_E00551:16.156795,(Balistidae_Sufflamen_fraenatum_E00935:7.48598,Balistidae_Abalistes_stellatus_E00936:7.48598)100:8.670815)58:1.543205)79:0.562154,Balistidae_Canthidermis_maculata_E00378:18.262154)47:0.168849)85:1.322535)45:0.594299)100:23.452163)100:24.902454)83:4.739604)93:4.357942)100:2.665148)45:0.334852)14:1.099514)12:3.210843,(Siganidae_Siganus_spinus_N29369:19.549085,(Siganidae_Siganus_argenteus_E00940:15.309017,((Siganidae_Siganus_stellatus_G01488:2.13575,Siganidae_Siganus_punctatus_E00958:2.13575)95:2.592878,Siganidae_Siganus_vulpinus_E00090:4.728628)99:10.580389)70:4.240068)100:65.561272)86:5.970061,(((Nemipteridae_Pentapodus_caninus_G01427:29.01165,(Nemipteridae_Scolopsis_bilineata_E00028:18.288757,(Nemipteridae_Scolopsis_frenata_E00911:15.26602,Nemipteridae_Scolopsis_margaritifera_G01478:15.26602)62:3.022737)91:10.722893)100:53.487828,(((Lethrinidae_Monotaxis_grandoculis_G01379:24.262868,Lethrinidae_Gymnocranius_grandoculis_E00952:24.262868)100:35.550271,((Lethrinidae_Lethrinus_olivaceus_E00751:19.124171,(Lethrinidae_Lethrinus_harak_E00905:13.41126,(Lethrinidae_Lethrinus_atkinsoni_E00750:10.827317,Lethrinidae_Lethrinus_obsoletus_E00910:10.827317)93:2.583943)100:5.71291)100:3.221007,Lethrinidae_Lethrinus_erythropterus_N18731:22.345178)100:37.467961)100:17.994739,((Sparidae_Spicara_alta_M01561:31.21182,((Sparidae_Argyrozona_argyrozona_E00802:17.041831,(Sparidae_Porcostoma_dentata_M01654:13.85699,Sparidae_Chrysoblephus_laticeps_M01644:13.85699)84:3.184841)96:10.391704,((Sparidae_Dentex_dentex_M01646:22.188994,(Sparidae_Pagellus_affinis_M01652:9.727684,Sparidae_Pagellus_erythrinus_M01653:9.727684)98:12.46131)78:3.491217,(Sparidae_Argyrops_spinifer_M01668:23.138655,(Sparidae_Pagrus_pagrus_E00514:21.354726,(Sparidae_Cheimerius_nufar_M01642:12.192044,Sparidae_Virididentex_acromegalus_M01660:12.192044)100:9.162682)42:1.783928)90:2.541556)41:1.753324)49:3.778285)91:6.765031,(((Sparidae_Archosargus_probatocephalus_E00249:17.997196,Sparidae_Lagodon_rhomboides_G01346:17.997196)93:5.771307,(Sparidae_Stenotomus_chrysops_E00246:20.427011,(Sparidae_Calamus_penna_E00762:10.91659,(Sparidae_Calamus_calamus_N29934:6.12452,Sparidae_Calamus_nodosus_M01641:6.12452)98:4.79207)100:9.510421)97:3.341491)92:8.28355,((Sparidae_Spondyliosoma_cantharus_M01659:15.37193,(Sparidae_Spicara_smaris_M01565:8.296527,Sparidae_Spicara_maena_M01562:8.296527)100:7.075403)100:13.797981,(Sparidae_Boopsoidea_inornata_M01639:28.12411,(((Sparidae_Sarpa_salpa_E00806:24.435239,(Sparidae_Diplodus_annularis_M01647:21.218612,((Sparidae_Lithognathus_mormyrus_M01649:18.060521,Sparidae_Diplodus_bermudensis_M01648:18.060521)51:2.223269,(Sparidae_Spicara_nigricauda_M01564:8.257299,Sparidae_Diplodus_capensis_E00807:8.257299)48:12.026491)19:0.934821)25:3.216628)6:1.506,((Sparidae_Centracanthus_cirrus_M01560:24.757097,((Sparidae_Oblada_melanura_M01650:12.258931,Sparidae_Pachymetopon_grande_M01651:12.258931)92:7.436012,Sparidae_Boops_boops_M01640:19.694943)89:5.062154)14:0.904188,(Sparidae_Crenidens_crenidens_M01645:22.686791,(Sparidae_Rhabdosargus_haffara_M01655:22.07839,(Sparidae_Acanthopagrus_catenula_E00953:11.627078,(Sparidae_Acanthopagrus_latus_M01638:10.142836,Sparidae_Sparidentex_hasta_M01657:10.142836)98:1.484243)100:10.451312)17:0.608401)20:2.974494)1:0.279955)38:1.286535,Sparidae_Sparus_aurata_M01658:27.227775)43:0.896335)48:1.0458)77:2.882142)100:5.924799)100:39.831027)51:4.6916)87:6.453611,((Datnioididae_Datnioides_microlepis_N14199:19.550662,Lobotidae_Lobotes_pacificus_surinamensis_G01359:19.550662)100:37.026833,(Hapalogenyidae_Hapalogenys_kishinouyei_M01723:22.896624,(Hapalogenyidae_Hapalogenys_nigripinnis_M01724:21.045715,Hapalogenyidae_Hapalogenys_aya_M01722:21.045715)64:1.850909)100:33.680871)100:32.375593)34:2.127329)18:3.047764,((((Leiognathidae_Gazza_minuta_G01298:14.8,Leiognathidae_Leiognathus_equulus_G01348:14.8)100:17.9,((Chaetodontidae_Chelmon_rostratus_G01248:20.044737,(Chaetodontidae_Forcipiger_flavissimus_E00562:12.316293,(Chaetodontidae_Hemitaurichthys_polylepis_E00240:10.594872,(Chaetodontidae_Heniochus_chrysostomus_E00748:7.002348,(Chaetodontidae_Heniochus_varius_E00547:6.89766,Chaetodontidae_Johnrandallia_nigrirostris_N06546:6.89766)56:0.104687)99:3.592524)99:1.721421)100:7.728444)100:2.098148,(Chaetodontidae_Prognathodes_aya_aculeatus_E00632:8.3,((Chaetodontidae_Chaetodon_plebeius_E00573:5.119738,(Chaetodontidae_Chaetodon_ornatissimus_G01243:1.558418,Chaetodontidae_Chaetodon_reticulatus_E00719:1.558418)100:3.56132)100:1.712304,(Chaetodontidae_Chaetodon_auriga_E00921:5.780234,(Chaetodontidae_Chaetodon_ocellatus_E00752:4.138245,(Chaetodontidae_Chaetodon_capistratus_E00205:3.178569,Chaetodontidae_Chaetodon_striatus_E00753:3.178569)59:0.959676)100:1.64199)99:1.051807)100:1.467959)100:13.842885)100:10.557115)66:59.5,((Sciaenidae_Menticirrhus_saxatilis_E00166:11.620871,Sciaenidae_Menticirrhus_undulatus_littoralis_E00127:11.620871)100:18.565687,(Sciaenidae_Aplodinotus_grunniens_E01108:26.196982,((((Sciaenidae_Micropogonias_undulatus_N01637:15.16883,Sciaenidae_Sciaenops_ocellatus_E01055:15.16883)99:6.673998,((Sciaenidae_Cynoscion_arenarius_E00511:4.565992,Sciaenidae_Cynoscion_regalis_E00164:4.565992)100:9.515238,Sciaenidae_Atractoscion_nobilis_E00125:14.08123)100:7.761599)25:1.718767,Sciaenidae_Pogonias_cromis_E00699:23.561596)14:1.633839,(((((Sciaenidae_Umbrina_coroides_E00628:9.293443,(Sciaenidae_Pareques_acuminatus_E01050:5.080209,Sciaenidae_Pareques_umbrosus_E00639:5.080209)100:4.213235)99:2.616221,Sciaenidae_Cheilotrema_saturnum_E00118:11.909664)100:9.548931,(((Sciaenidae_Bairdiella_chrysoura_E00165:12.133593,(Sciaenidae_Corvula_sanctaeluciae_E01047:6.654654,Sciaenidae_Odontoscion_dentex_E01049:6.654654)100:5.478939)99:2.429681,Sciaenidae_Stellifer_lanceolatus_E00608:14.563274)100:6.009743,Sciaenidae_Larimus_breviceps_E01048:20.573017)59:0.885578)98:1.73621,(Sciaenidae_Genyonemus_lineatus_E00138:18.876639,Sciaenidae_Seriphus_politus_E00123:18.876639)98:4.318166)93:1.34917,Sciaenidae_Leiostomus_xanthurus_G01349:24.543975)22:0.65146)16:1.001547)72:3.989577)100:62.013442)10:0.765376,(((Emmelichthyidae_Erythrocles_schlegelii_E00954:27.579543,Emmelichthyidae_Erythrocles_scintillans_N14652:27.579543)100:46.018063,(((((Haemulidae_Plectorhinchus_chaetodonoides_E00857:13.006536,Haemulidae_Plectorhinchus_vittatus_E00856:13.006536)100:37.129095,(Haemulidae_Orthopristis_chrysoptera_E00607:30.034222,(((Haemulidae_Xenistius_californiensis_E00229:17.753606,((Haemulidae_Haemulon_vittatum_E00218:12.152695,Haemulidae_Haemulon_aurolineatum_E00635:12.152695)95:1.893542,(Haemulidae_Haemulon_sciurus_E00199:7.995563,Haemulidae_Haemulon_plumierii_E00279:7.995563)100:6.050674)100:3.707369)100:8.591362,(Haemulidae_Anisotremus_surinamensis_N17175:17.046079,Haemulidae_Anisotremus_virginicus_E00200:17.046079)100:9.298889)88:2.628348,(Haemulidae_Pomadasys_corvinaeformis_E00761:24.818065,Haemulidae_Conodon_nobilis_E00613:24.818065)99:4.155251)69:1.060907)100:20.101408)100:14.46437,(((Lutjanidae_Lutjanus_griseus_N20115:18.376983,(Lutjanidae_Lutjanus_biguttatus_E00569:16.678288,(Lutjanidae_Lutjanus_mahogoni_G01362:12.806996,(Lutjanidae_Ocyurus_chrysurus_E00283:11.605735,(Lutjanidae_Lutjanus_campechanus_E00592:10.858888,Lutjanidae_Rhomboplites_aurorubens_E00593:10.858888)65:0.746847)54:1.20126)100:3.871292)70:1.698694)100:6.512192,(Lutjanidae_Macolor_niger_E00939:16.050397,((Lutjanidae_Caesio_caerulaurea_lunaris_E00920:11.391973,(Lutjanidae_Pterocaesio_pisang_N01547:6.935708,(Lutjanidae_Caesio_teres_E00951:5.205126,Lutjanidae_Caesio_xanthonota_E00950:5.205126)97:1.730581)97:4.456265)30:1.300312,(Lutjanidae_Caesio_cuning_N01544:11.472291,(Lutjanidae_Pterocaesio_tile_E00961:5.558071,Lutjanidae_Caesio_varilineata_E00949:5.558071)100:5.91422)22:1.219994)76:3.358113)100:8.838778)100:24.410863,((Lutjanidae_Aprion_virescens_E00828:35.34793,(Lutjanidae_Pristipomoides_aquilonaris_E00594:21.99308,(Lutjanidae_Aphareus_furca_E00563:18.947617,Lutjanidae_Pristipomoides_auricilla_E00746:18.947617)84:3.045463)100:13.35485)100:7.167034,Lutjanidae_Apsilus_dentatus_E00770:42.514964)98:6.785074)100:15.299962)59:5.856764,((Callanthiidae_Grammatonotus_surugaensis_N05516:29.493212,Callanthiidae_Callanthias_australis_M01721:29.493212)100:37.816047,(Malacanthidae_Malacanthus_plumieri_E00774:41.404506,(Malacanthidae_Caulolatilus_intermedius_E00595:15.260829,Malacanthidae_Caulolatilus_princeps_E00231:15.260829)100:26.143677)100:25.904753)32:3.147505)20:1.142271,(Pomacanthidae_Chaetodontoplus_melanosoma_G01244:41.716791,(((Pomacanthidae_Pomacanthus_arcuatus_E00754:6.042634,Pomacanthidae_Pomacanthus_zonipectus_G01448:6.042634)100:12.944463,(Pomacanthidae_Pomacanthus_semicirculatus_E00849:13.001795,Pomacanthidae_Pomacanthus_imperator_E00710:13.001795)99:5.985302)100:14.065752,((Pomacanthidae_Holacanthus_tricolor_E00198:11.971583,(Pomacanthidae_Holacanthus_ciliaris_E00209:1.789579,Pomacanthidae_Holacanthus_passer_E00282:1.789579)100:10.182004)100:10.626345,(((Pomacanthidae_Apolemichthys_trimaculatus_E00839:17.130804,Pomacanthidae_Centropyge_loricula_E00284:17.130804)57:2.177167,Pomacanthidae_Pygoplites_diacanthus_E00534:19.307972)34:1.757297,(Pomacanthidae_Centropyge_bicolor_E00550:8.29974,Pomacanthidae_Centropyge_nox_E00542:8.29974)100:12.765528)67:1.53266)100:10.45492)100:8.663942)100:29.882245)28:1.998571)20:2.787527,((Luvaridae_Luvarus_imperialis_E00509:60.6,(Zanclidae_Zanclus_cornutus_E00894:55.646264,((((Acanthuridae_Acanthurus_bahianus_E00005:13.711501,(Acanthuridae_Ctenochaetus_striatus_E00982:10.688578,(Acanthuridae_Ctenochaetus_truncatus_E00854:7.13027,Acanthuridae_Ctenochaetus_strigosus_E00050:7.13027)100:3.558308)100:3.022923)98:1.85822,(Acanthuridae_Acanthurus_lineatus_E00889:14.645325,(Acanthuridae_Acanthurus_triostegus_E00711:12.831355,(Acanthuridae_Acanthurus_leucosternon_E00880:10.862489,Acanthuridae_Acanthurus_guttatus_E00709:10.862489)61:1.968866)69:1.813971)44:0.924395)100:22.721941,(Acanthuridae_Zebrasoma_velifer_E00029:15.903835,(Acanthuridae_Paracanthurus_hepatus_E00002:13.250956,(Acanthuridae_Zebrasoma_flavescens_E00730:2.741646,(Acanthuridae_Zebrasoma_scopas_E00859:1.728906,Acanthuridae_Zebrasoma_rostratum_N01742:1.728906)84:1.01274)100:10.509311)43:2.652879)100:22.387826)100:11.708339,(Acanthuridae_Naso_lituratus_G01514:6.462335,(Acanthuridae_Naso_unicornis_E00701:3.950225,Acanthuridae_Naso_brevirostris_E00918:3.950225)50:2.512111)100:43.537665)100:5.646264)100:4.953736)100:8.139361,(Monodactylidae_Monodactylus_sebae_N21267:18.412833,Monodactylidae_Monodactylus_argenteus_E00827:18.412833)100:50.326529)65:7.645772)12:16.580243)31:1.162805)52:1.297632,(Drepaneidae_Drepane_punctata_E00250:67.324975,(Ephippidae_Chaetodipterus_faber_E00614:31.422882,(Ephippidae_Platax_orbicularis_E00898:7.050025,Ephippidae_Platax_teira_E00858:7.050025)100:24.372858)100:35.902093)100:28.100839)41:1.238437,((Sillaginidae_Sillago_chondropus_N29390:37.536058,Sillaginidae_Sillago_sihama_E00824:37.536058)100:52.811289,(Moronidae_Dicentrarchus_labrax_E01132:25.835264,(Moronidae_Morone_saxatilis_G01380:14.434319,((Moronidae_Morone_mississippiensis_E00087:4.338811,Moronidae_Morone_americana_E00017:4.338811)100:8.886923,Moronidae_Morone_chrysops_E00992:13.225734)99:1.208585)100:11.400945)100:64.512083)52:6.316903)82:2.914616)22:1.52873,((((Labridae_Lachnolaimus_maximus_E00014:63.765883,(Labridae_Haletta_semifasciata_G01312:57.366462,(((Labridae_Bodianus_axillaris_E00947:14.126321,Labridae_Bodianus_mesothorax_E00560:14.126321)100:21.940491,Labridae_Clepticus_parrae_E00015:36.066811)95:9.490187,Labridae_Decodon_puellaris_E00620:45.556998)93:11.809464)100:6.399421)100:15.31643,(((Labridae_Novaculichthys_taeniourus_E00926:27.957084,Labridae_Xyrichtys_novacula_martinicensis_E00016:27.957084)100:32.785817,(((Labridae_Hologymnosus_doliatus_E00567:26.446155,(Labridae_Coris_caudimacula_E00861:19.055829,(Labridae_Coris_formosa_E00912:6.784147,Labridae_Coris_gaimard_E00091:6.784147)100:12.271682)97:7.390326)100:13.262433,((((Labridae_Macropharyngodon_bipartitus_E00895:22.325167,((Labridae_Halichoeres_iridis_E00928:12.571826,Labridae_Halichoeres_biocellatus_E00727:12.571826)88:5.284009,(Labridae_Coris_batuensis_N18137:9.647878,Labridae_Halichoeres_margaritaceus_N18205:9.647878)93:8.207957)91:4.469333)99:9.091955,((Labridae_Thalassoma_quinquevittatum_E00092:8.391524,(Labridae_Thalassoma_amblycephalum_E00891:5.844199,Labridae_Thalassoma_lunare_E00902:5.844199)99:2.547325)77:1.53207,Labridae_Gomphosus_varius_E00085:9.923595)100:21.493527)88:2.694982,(Labridae_Oxyjulis_californica_G01413:20.672654,Labridae_Halichoeres_bathyphilus_bivittatus_E00637:20.672654)100:13.43945)34:1.243638,(((Labridae_Stethojulis_balteata_E00089:11.982243,Labridae_Stethojulis_strigiventer_E00908:11.982243)100:19.58866,Labridae_Anampses_lineatus_E00932:31.570903)38:1.966838,((Labridae_Diproctacanthus_xanthurus_G01278:7.56969,Labridae_Labropsis_australis_G01345:7.56969)100:14.968896,(Labridae_Labroides_dimidiatus_E00848:19.755128,Labridae_Labrichthys_unilineatus_G01344:19.755128)47:2.783458)100:10.999155)34:1.818001)79:4.352847)100:16.760997,Labridae_Cheilio_inermis_E00906:56.469586)93:4.273314)100:11.872601,(((Labridae_Tautogolabrus_adspersus_G01500:13.78171,Labridae_Tautoga_onitis_G01499:13.78171)100:52.059273,(((Labridae_Cheilinus_oxycephalus_E00901:9.346468,Labridae_Cheilinus_chlorourus_E00907:9.346468)100:17.899846,(Labridae_Epibulus_insidiator_E00879:22.787836,(Labridae_Wetmorella_nigropinnata_E00948:19.234176,((Labridae_Oxycheilinus_celebicus_G01412:10.998336,(Labridae_Oxycheilinus_unifasciatus_E00721:6.210271,Labridae_Oxycheilinus_digramma_E00873:6.210271)100:4.788065)100:6.975625,Labridae_Cheilinus_fasciatus_E00876:17.973961)55:1.260215)95:3.553661)98:4.458478)100:34.511287,(Labridae_Calotomus_carolinus_N27783:45.339765,(Labridae_Cryptotomus_roseus_N27805:39.69492,(((Labridae_Leptoscarus_vaigiensis_E00877:21.137605,(Labridae_Sparisoma_aurofrenatum_E00008:5.898284,(Labridae_Sparisoma_chrysopterum_E00070:2.867368,Labridae_Sparisoma_viride_E00004:2.867368)91:3.030916)100:15.23932)97:4.527229,(Labridae_Cetoscarus_bicolor_E00566:20.946072,(Labridae_Chlorurus_sordidus_E00837:12.737703,((Labridae_Scarus_iseri_E00013:9.106543,(Labridae_Scarus_rubroviolaceus_E00874:6.747125,(Labridae_Scarus_niger_E00875:6.080009,(Labridae_Chlorurus_gibbus_E00561:4.067331,Labridae_Scarus_ghobban_E00878:4.067331)98:2.012678)64:0.667116)69:2.359417)79:1.233549,(Labridae_Scarus_globiceps_N27829:7.074799,Labridae_Scarus_quoyi_E00872:7.074799)97:3.265292)90:2.397612)100:8.208369)84:4.718761)80:3.798221,Labridae_Hipposcarus_longiceps_E00737:29.463055)99:10.231865)81:5.644844)100:16.417836)99:4.083381)100:4.827796,((Labridae_Pseudocheilinus_hexataenia_E00945:32.034054,Labridae_Pseudocheilinus_evanidus_E00944:32.034054)100:17.344157,(Labridae_Pteragogus_enneacanthus_G01457:44.322303,(Labridae_Cirrhilabrus_punctatus_E00553:11.427096,Labridae_Cirrhilabrus_katherinae_E00728:11.427096)100:32.895207)92:5.055907)100:21.290568)63:1.946723)100:6.466812)100:14.352823,Centrogenyidae_Centrogenys_vaigiensis_G01239:93.435137)69:2.864863,((Uranoscopidae_Astroscopus_ygraecum_E01028:43.64783,(Uranoscopidae_Uranoscopus_sulphureus_E00538:40.751062,(Uranoscopidae_Kathetostoma_albigutta_E01022:5.51392,Uranoscopidae_Kathetostoma_averruncus_E00324:5.51392)100:35.237142)69:2.896768)100:43.397216,((Ammodytidae_Ammodytes_dubius_N02375:4.545754,Ammodytidae_Ammodytes_hexapterus_E00414:4.545754)100:76.648815,(Cheimarrichthyidae_Cheimarrichthys_fosteri_N07713:75.098725,(Pinguipedidae_Parapercis_punctulata_E01091:23.232296,(Pinguipedidae_Parapercis_hexophtalma_E01083:11.448212,Pinguipedidae_Parapercis_clathrata_E00707:11.448212)100:11.784084)100:51.866429)38:6.095843)90:5.850478)98:9.254954)59:4.807597)21:3.692403,((Gerreidae_Gerres_longirostris_E00835:37.489104,((Gerreidae_Ulaema_lefroyi_G01507:13.192161,(Gerreidae_Eucinostomus_argenteus_E00575:9.872334,Gerreidae_Eucinostomus_gula_E00756:9.872334)91:3.319827)100:15.198703,Gerreidae_Gerres_cinereus_E00292:28.390864)96:9.09824)85:9.641897,(Gerreidae_Eugerres_plumieri_G01291:37.068543,Gerreidae_Gerres_oyena_E00823:37.068543)80:10.062457)100:57.668999)83:9.793706)84:7.006294,(((Kurtidae_Kurtus_indicus_N17950:28.822492,Kurtidae_Kurtus_gulliveri_E00188:28.822492)100:51.477508,(Apogonidae_Pseudamia_gelatinosa_E00568:66.069906,(((((Apogonidae_Gymnapogon_urospilotus_E00539:19.718699,Apogonidae_Cercamia_eremia_E00546:19.718699)86:7.557859,(Apogonidae_Phaeoptyx_pigmentaria_E00506:14.733964,(Apogonidae_Astrapogon_stellatus_N03004:3.054169,Apogonidae_Astrapogon_puncticulatus_E00109:3.054169)100:11.679795)100:12.542594)52:2.159513,Apogonidae_Apogon_campbelli_E01069:29.43607)48:2.054352,(Apogonidae_Rhabdamia_cypselura_E01095:29.780145,((Apogonidae_Nectamia_bandanensis_E01040:12.144074,Apogonidae_Nectamia_fusca_E00732:12.144074)100:14.214651,((Apogonidae_Sphaeramia_orbicularis_N03178:17.867307,Apogonidae_Pristiapogon_exostigma_E00702:17.867307)61:4.245741,(((Apogonidae_Cheilodipterus_isostigmus_E00528:15.7636,Apogonidae_Pterapogon_kauderni_E00190:15.7636)31:1.377848,((Apogonidae_Ostorhinchus_lateralis_G01203:12.779004,Apogonidae_Ostorhinchus_cookii_E01087:12.779004)53:1.20126,Apogonidae_Cheilodipterus_quinquelineatus_G01247:13.980264)80:3.161183)21:1.749218,Apogonidae_Archamia_biguttata_E00522:18.890665)96:3.222383)50:4.245678)33:3.42142)57:1.710277)53:4.845161,Apogonidae_Fowleria_aurita_E01090:36.335583)100:29.734323)100:14.230094)100:22,((Odontobutidae_Odontobutis_potamophila_E01137:27.262324,Odontobutidae_Perccottus_glenii_G01429:27.262324)100:45.537676,(((Eleotridae_Dormitator_maculatus_E00169:36.580064,Eleotridae_Eleotris_acanthopoma_pisonis_E00741:36.580064)100:18.89916,(Eleotridae_Ophiocara_porocephala_E01101:25.041667,Eleotridae_Oxyeleotris_selheimi_N01730:25.041667)100:30.437557)61:9.339723,(((Gobiidae_Periophthalmus_kalolo_E00537:43.157061,(Gobiidae_Lepidogobius_lepidus_G01351:35.857571,(Gobiidae_Ctenogobius_boleosoma_E00172:23.920705,(Gobiidae_Gnatholepis_cauerensis_E00099:20.683658,Gobiidae_Evorthodus_lyricus_E00171:20.683658)73:3.237047)100:11.936866)67:7.29949)45:2.273654,Gobiidae_Gnatholepis_anjerensis_E01075:45.430715)68:10.255385,((Gobiidae_Bathygobius_mystacium_E00104:43.344044,(Gobiidae_Psammogobius_biocellatus_E00740:34.181035,(Gobiidae_Stonogobiops_nematodes_N16820:31.059786,Gobiidae_Amblygobius_decussatus_E00533:31.059786)32:3.121249)42:9.163009)28:5.954756,((Gobiidae_Bollmannia_communis_E00617:42.937629,((Gobiidae_Risor_ruber_E00107:17.412985,Gobiidae_Elacatinus_oceanops_E00108:17.412985)100:8.580827,Gobiidae_Gobiosoma_bosc_E00097:25.993812)100:16.943817)67:4.606735,(((((Gobiidae_Fusigobius_inframaculatus_E01076:16.965261,Gobiidae_Fusigobius_duospilus_E00863:16.965261)100:7.151361,((Gobiidae_Lophogobius_cyprinoides_E00508:14.077341,(Gobiidae_Coryphopterus_personatus_E00405:11.025764,Gobiidae_Coryphopterus_glaucofraenum_E00100:11.025764)93:3.051577)100:7.578386,Gobiidae_Fusigobius_neophytus_E00733:21.655727)61:2.460895)100:11.685369,(Gobiidae_Asterropteryx_semipunctata_E01089:28.023006,((Gobiidae_Amblyeleotris_wheeleri_E01073:8.777439,Gobiidae_Amblyeleotris_guttata_E01043:8.777439)100:10.230726,(Gobiidae_Ctenogobiops_crocineus_E01097:17.955098,(Gobiidae_Amblyeleotris_gymnocephala_E00409:16.212389,Gobiidae_Vanderhorstia_ornatissima_E01088:16.212389)39:1.742709)30:1.053067)53:9.014841)53:7.778985)53:7.036957,((Gobiidae_Eviota_prasites_E01044:35.857662,((Gobiidae_Eviota_saipanensis_E00714:19.246466,Gobiidae_Eviota_albolineata_E01041:19.246466)100:8.743199,(Gobiidae_Paragobiodon_modestus_E01098:15.334997,Gobiidae_Gobiodon_quinquestrigatus_E01085:15.334997)100:12.654668)100:7.867997)90:5.624758,(Gobiidae_Cryptocentrus_sp_E00407:28.886506,((Gobiidae_Istigobius_ornatus_E01107:5.272943,Gobiidae_Istigobius_decoratus_E01078:5.272943)100:19.068389,(Gobiidae_Cabillus_lacertops_E01093:20.307061,Gobiidae_Oplopomus_oplopomus_E01067:20.307061)79:4.034272)90:4.545173)50:12.595914)22:1.356528)23:1.573281,((((Gobiidae_Amblygobius_phalaena_E00736:33.764841,(Gobiidae_Valenciennea_strigata_E01094:22.629435,Gobiidae_Valenciennea_puellaris_E01096:22.629435)100:11.135406)82:6.820681,((Gobiidae_Priolepis_cincta_E01077:13.305679,Gobiidae_Priolepis_hipoliti_E00106:13.305679)100:20.881009,(Gobiidae_Lythrypnus_dalli_E00126:27.125419,(Gobiidae_Trimma_okinawae_E00726:12.285939,(Gobiidae_Trimma_caesiura_E01039:10.580599,Gobiidae_Trimma_haima_E01084:10.580599)37:1.70534)60:14.83948)99:7.061268)93:6.398835)44:1.059324,(Gobiidae_Caffrogobius_caffer_E01056:11.787005,Gobiidae_Caffrogobius_saldanha_E01057:11.787005)100:29.857841)28:1.137478,(Gobiidae_Nemateleotris_magnifica_N20888:35.753391,((Gobiidae_Ptereleotris_microlepis_E00554:9.49243,Gobiidae_Ptereleotris_evides_E00565:9.49243)100:20.29337,((Gobiidae_Microdesmus_bahianus_E00112:11.858864,(Gobiidae_Cerdale_floridana_E00113:9.221137,Gobiidae_Microdesmus_longipinnis_E00388:9.221137)95:2.637727)100:11.987488,Gobiidae_Gunnellichthys_monostigma_E00545:23.846352)100:5.939448)100:5.96759)99:7.028934)36:1.629905)19:3.132135)24:1.754436)84:6.387299)100:9.132848)100:7.981053)100:29.5)100:19.3)45:0.616549,(((((((((((((((((Syngnathidae_Syngnathus_louisianae:1.64747178,Syngnathidae_Syngnathus_pelagicus:1.64747178)NA:2.500772656,Syngnathidae_Syngnathus_floridae:4.148244436)NA:0.735801219,(Syngnathidae_Syngnathus_fuscus:2.659670325,Syngnathidae_Syngnathus_scovelli:2.659670325)NA:2.22437533)NA:1.046914322,Syngnathidae_Syngnathus_springeri:5.930959977)NA:0.8854576419,((((Syngnathidae_Syngnathus_taenionotus:1.098411379,Syngnathidae_Syngnathus_rostellatus:1.098411379)NA:0.5391943079,Syngnathidae_Syngnathus_typhle:1.637605687)NA:1.228949781,Syngnathidae_Syngnathus_abaster:2.866555468)NA:2.237435883,Syngnathidae_Syngnathus_acus:5.103991351)NA:1.712426268)NA:2.339725077,(((Syngnathidae_Syngnathus_leptorhynchus:1.162582496,Syngnathidae_Syngnathus_californiensis:1.162582496)NA:0.5980427157,Syngnathidae_Syngnathus_exilis:1.760625212)NA:1.7168283,Syngnathidae_Syngnathus_auliscus:3.477453512)NA:5.678689184)NA:15.47014846,((Syngnathidae_Cosmocampus_elucens:1.071242678,Syngnathidae_Halicampus_crinitus:1.071242678)NA:21.50719314,(Syngnathidae_Enneacampus_ansorgii:21.14440621,Syngnathidae_Cosmocampus_arctus:21.14440621)NA:1.434029614)NA:2.047855337)NA:4.294156772,Syngnathidae_Halicampus_dunckeri:28.92044793)NA:1.495193922,((((((Syngnathidae_Hippocampus_reidi:1.695002486,Syngnathidae_Hippocampus_ingens:1.695002486)NA:1.528227702,Syngnathidae_Hippocampus_kuda:3.223230188)NA:1.877755538,Syngnathidae_Hippocampus_erectus:5.100985727)NA:0.9580659755,((Syngnathidae_Hippocampus_subelongatus:3.129883929,Syngnathidae_Hippocampus_comes:3.129883929)NA:0.6192857953,(Syngnathidae_Hippocampus_histrix:0.7712945844,Syngnathidae_Hippocampus_barbouri:0.7712945844)NA:2.97787514)NA:2.309881977)NA:0.6924689595,Syngnathidae_Hippocampus_abdominalis:6.751520662)NA:21.24316687,(Syngnathidae_Trachyrhamphus_bicoarctatus:26.01879758,Syngnathidae_Idiotropiscis_lumnitzeri:26.01879758)NA:1.975889961)NA:2.420954315)NA:1.434308675,((((Syngnathidae_Vanacampus_poecilolaemus:2.723310401,Syngnathidae_Vanacampus_phillipi:2.723310401)NA:6.2095767,Syngnathidae_Hypselognathus_rostratus:8.932887101)NA:9.41837837,Syngnathidae_Festucalex_wassi:18.35126547)NA:12.48002567,(Syngnathidae_Hippichthys_penicillus:21.01512189,Syngnathidae_Siokunichthys_nigrolineatus:21.01512189)NA:9.816169246)NA:1.018659387)NA:4.199294822,((Syngnathidae_Phyllopteryx_taeniolatus:6.981782243,Syngnathidae_Phycodurus_eques:6.981782243)NA:15.73757322,Syngnathidae_Syngnathoides_biaculeatus:22.71935546)NA:13.32988988)NA:0.677401059,(((((Syngnathidae_Corythoichthys_intestinalis:1.276538977,Syngnathidae_Corythoichthys_flavofasciatus:1.276538977)NA:2.002540058,Syngnathidae_Corythoichthys_haematopterus:3.279079036)NA:4.141816721,Syngnathidae_Corythoichthys_amplexus:7.420895757)NA:2.846206773,Syngnathidae_Corythoichthys_schultzi:10.26710253)NA:12.72757089,Syngnathidae_Stigmatopora_nigra:22.99467342)NA:13.73197298)NA:13.6134112,((((((Syngnathidae_Doryichthys_boaja:10.01894172,Syngnathidae_Doryichthys_martensii:10.01894172)NA:4.00823038,Syngnathidae_Microphis_brachyurus:14.0271721)NA:1.684125218,(Syngnathidae_Microphis_cuncalus:13.08462969,Syngnathidae_Microphis_deocata:13.08462969)NA:2.626667623)NA:10.87109221,Syngnathidae_Choeroichthys_sculptus:26.58238952)NA:1.76305432,(((Syngnathidae_Dunckerocampus_dactyliophorus:5.983371526,Syngnathidae_Dunckerocampus_pessuliferus:5.983371526)NA:3.924786455,Syngnathidae_Dunckerocampus_boylei:9.908157981)NA:15.45164727,(Syngnathidae_Doryrhamphus_excisus:18.79290438,Syngnathidae_Doryrhamphus_janssi:18.79290438)NA:6.56690088)NA:2.985638588)NA:8.984350358,(Syngnathidae_Nerophis_ophidion:8.78452266,Syngnathidae_Entelurus_aequoreus:8.78452266)NA:28.54527154)NA:13.01026341)NA:15.78892906,(Solenostomidae_Solenostomus_paradoxus:2.648544856,Solenostomidae_Solenostomus_cyanopterus:2.648544856)NA:63.48044182)NA:6.556852693,((((Fistulariidae_Fistularia_tabacaria:0.6295977151,Fistulariidae_Fistularia_petimba:0.6295977151)NA:4.870264905,(Fistulariidae_Fistularia_corneta:1.663445783,Fistulariidae_Fistularia_commersonii:1.663445783)NA:3.836416838)NA:59.76477767,(Aulostomidae_Aulostomus_chinensis:5.376671319,Aulostomidae_Aulostomus_maculatus:5.376671319)NA:59.88796897)NA:6.639961384,((Centriscidae_Centriscus_scutatus:14.16174268,Centriscidae_Aeoliscus_strigatus:14.16174268)NA:46.6699352,(Centriscidae_Macroramphosus_gracilis:3.971503339,Centriscidae_Macroramphosus_scolopax:3.971503339)NA:56.86017454)NA:11.0729238)NA:0.7812376944)NA:1.614160633,(((((((((((Callionymidae_Draculo_mirabilis:11.13839606,Callionymidae_Repomucenus_belcheri:11.13839606)NA:2.084783929,Callionymidae_Repomucenus_curvicornis:13.22317998)NA:1.218384076,(Callionymidae_Repomucenus_limiceps:8.784060543,Callionymidae_Repomucenus_calcaratus:8.784060543)NA:5.657503517)NA:8.894669125,Callionymidae_Diplogrammus_goramensis:23.33623318)NA:1.754141868,((Callionymidae_Calliurichthys_grossi:18.48184401,Callionymidae_Calliurichthys_scaber:18.48184401)NA:5.379213737,Callionymidae_Repomucenus_lunatus:23.86105774)NA:1.22931731)NA:0.6749618517,((((Callionymidae_Synchiropus_stellatus:2.841283006,Callionymidae_Synchiropus_ocellatus:2.841283006)NA:5.847661396,Callionymidae_Synchiropus_moyeri:8.688944402)NA:10.58483112,(Callionymidae_Synchiropus_splendidus:3.452761136,Callionymidae_Synchiropus_picturatus:3.452761136)NA:15.82101438)NA:5.044533954,Callionymidae_Dactylopus_dactylopus:24.31830947)NA:1.447027432)NA:2.193507669,Callionymidae_Callionymus_delicatulus:27.95884457)NA:2.708686171,Callionymidae_Anaora_tentaculata:30.66753074)NA:1.264443752,(((Callionymidae_Synchiropus_goodenbeani:2.149667165,Callionymidae_Foetorepus_agassizii:2.149667165)NA:6.541669648,Callionymidae_Synchiropus_atrilabiatus:8.691336813)NA:8.334582018,(Callionymidae_Foetorepus_altivelis:2.785330057,Callionymidae_Synchiropus_masudai:2.785330057)NA:14.24058877)NA:14.90605567)NA:39.37301195,((((((((Mullidae_Parupeneus_multifasciatus:2.924153799,Mullidae_Parupeneus_trifasciatus:2.924153799)NA:3.821707842,Mullidae_Parupeneus_rubescens:6.745861641)NA:2.08480401,Mullidae_Parupeneus_cyclostomus:8.830665651)NA:1.471039798,Mullidae_Parupeneus_barberinus:10.30170545)NA:2.80165568,Mullidae_Parupeneus_barberinoides:13.10336113)NA:16.2304445,(Mullidae_Pseudupeneus_maculatus:11.15584767,Mullidae_Pseudupeneus_grandisquamis:11.15584767)NA:18.17795795)NA:9.857111694,(Mullidae_Upeneichthys_lineatus:30.75979777,Mullidae_Mullus_auratus:30.75979777)NA:8.431119551)NA:2.840421625,(((Mullidae_Mulloidichthys_vanicolensis:2.225285658,Mullidae_Mulloidichthys_martinicus:2.225285658)NA:1.042996611,Mullidae_Mulloidichthys_dentatus:3.268282269)NA:34.75908482,Mullidae_Upeneus_tragula:38.02736709)NA:4.00397186)NA:29.2736475)NA:2.093092085,(((Dactylopteridae_Dactyloptena_orientalis:7.558744923,Dactylopteridae_Dactyloptena_peterseni:7.558744923)NA:27.00934647,Dactylopteridae_Dactylopterus_volitans:34.56809139)NA:36.15548501,(Pegasidae_Eurypegasus_draconis:15.75564614,Pegasidae_Pegasus_volitans:15.75564614)NA:54.96793026)NA:2.674502134)NA:0.9019214714)NA:20.26999999,((Chiasmodontidae_Chiasmodon_sp_N33662:35.900363,(Chiasmodontidae_Kali_indica_E01106:26.172811,(Chiasmodontidae_Chiasmodon_niger_E01115:7.631938,Chiasmodontidae_Kali_kerberti_E00385:7.631938)100:18.540873)100:9.727552)100:7.999637,(((Pomatomidae_Pomatomus_saltatrix_E00516:34.501511,(Scombridae_Scomber_scombrus_E00626:5.218897,Scombridae_Scomber_japonicus_E00247:5.218897)100:29.282614)24:3.5244,((((((Nomeidae_Psenes_maculatus_N23089:15.585049,Nomeidae_Cubiceps_baxteri_G01271:15.585049)96:4.278115,((Nomeidae_Cubiceps_pauciradiatus_E00667:11.812347,Nomeidae_Psenes_cyanophrys_E00666:11.812347)80:5.260027,Nomeidae_Cubiceps_gracilis_E00672:17.072374)51:2.790791)97:4.116265,(Ariommatidae_Ariomma_melanum_E00665:11.909953,Ariommatidae_Ariomma_bondi_E01126:11.909953)100:12.069477)98:4.418945,((((Scombridae_Euthynnus_affinis_E00830:3.203201,Scombridae_Euthynnus_alletteratus_E00696:3.203201)100:6.450982,(Scombridae_Auxis_rochei_E00673:8.111067,Scombridae_Katsuwonus_pelamis_E00747:8.111067)63:1.543115)100:5.660961,Scombridae_Thunnus_albacares_E00831:15.315143)100:7.937094,(((Scombridae_Scomberomorus_maculatus_sp_E00631:6.133934,Scombridae_Scomberomorus_regalis_commerson_E00694:6.133934)100:10.246244,Scombridae_Sarda_sarda_E00243:16.380177)54:4.049284,(Scombridae_Acanthocybium_solandri_E00927:17.804624,Scombridae_Gymnosarda_unicolor_E00832:17.804624)47:2.624837)76:2.822775)98:5.146138)86:2.774691,Icosteidae_Icosteus_aenigmaticus_G01336:31.173066)14:3.403945,((Centrolophidae_Icichthys_lockingtoni_E00387:30.203115,(Stromateidae_Peprilus_paru_E00622:8.075788,(Stromateidae_Peprilus_simillimus_E00136:6.017935,(Stromateidae_Peprilus_burti_E00600:1.045213,Stromateidae_Peprilus_triacanthus_N30548:1.045213)100:4.972723)97:2.057853)100:22.127326)15:3.379426,((Gempylidae_Paradiplospinus_gracilis_N15143:29.60776,((Bramidae_Brama_brama_E00970:12.826299,Bramidae_Brama_japonica_N05217:12.826299)99:4.16464,((Bramidae_Taractichthys_longipinnis_E00684:9.552293,Bramidae_Taractes_asper_N05227:9.552293)99:6.120852,(Bramidae_Pterycombus_brama_E00996:10.740863,Bramidae_Pteraclis_aesticola_N05223:10.740863)97:4.932282)59:1.317794)100:12.616821)33:3.573327,((Scombrolabracidae_Scombrolabrax_heterolepis_E00976:27.834279,(Caristiidae_Caristius_sp_E00810:5.449361,(Caristiidae_Caristius_macropus_N06078:4.262332,Caristiidae_Platyberyx_opalescens_N06085:4.262332)93:1.187029)100:22.384918)35:4.525999,(((Trichiuridae_Trichiurus_lepturus_E00596:21.303813,((Trichiuridae_Evoxymetopon_taeniatus_E00650:10.980682,Trichiuridae_Lepidopus_altifrons_E00474:10.980682)82:8.078811,Trichiuridae_Assurger_anzac_G01210:19.059493)28:2.24432)100:3.265028,(Trichiuridae_Benthodesmus_simonyi_E00475:17.323976,Trichiuridae_Aphanopus_carbo_E00274:17.323976)97:7.244866)100:6.720836,(Gempylidae_Ruvettus_pretiosus_E00226:28.414472,((Gempylidae_Neoepinnula_orientalis_E00518:10.578892,Gempylidae_Neoepinnula_americana_E00471:10.578892)100:16.442778,(Gempylidae_Gempylus_serpens_E00693:24.40226,Gempylidae_Nealotus_tripes_E00287:24.40226)39:2.61941)32:1.392801)35:2.875206)30:1.0706)6:0.820808)22:0.401454)4:0.99447)15:3.4489)8:0.17382,(Arripidae_Arripis_georgianus_M01539:10.167771,(Arripidae_Arripis_truttacea_M01541:0.751292,Arripidae_Arripis_trutta_M01540:0.751292)100:9.416479)100:28.03196)43:5.700269)99:50.67)84:27.646549)100:4.583451,((Batrachoididae_Porichthys_plectrodon_E00590:16.92584,Batrachoididae_Porichthys_notatus_E00058:16.92584)100:22.87416,(Batrachoididae_Batrachoides_pacifici_N04533:26.43446,(Batrachoididae_Sanopus_sp_E00009:23.295265,((Batrachoididae_Opsanus_beta_E00698:4.013327,Batrachoididae_Opsanus_pardus_E00513:4.013327)99:12.765576,Batrachoididae_Opsanus_tau_E00040:16.778902)80:6.516362)66:3.139195)94:13.36554)100:87)100:6,(((Dinematichthyidae_Dinematichthys_iluocoeteoides_E00235:6.066671,Dinematichthyidae_Diancistrus_sp_E00236:6.066671)100:34.96526,(((Bythitidae_Brosmophyciops_pautzkei_E00717:16.899321,(Bythitidae_Diplacanthopoma_brachysoma_E00452:8.563562,Bythitidae_Diplacanthopoma_brunnea_N05377:8.563562)94:8.335759)73:5.911088,(Bythitidae_Bidenichthys_capensis_E00794:20.142523,(Bythitidae_Cataetyx_rubrirostris_lepidogenys_E00261:19.374112,Bythitidae_Barathronus_maculatus_N02779:19.374112)40:0.768411)56:2.667886)74:5.380538,Bythitidae_Brosmophycis_marginata_N05317:28.190947)100:12.840984)100:34.368069,(((Ophidiidae_Petrotyx_sanguineus_E00206:47.274274,(Ophidiidae_Carapus_bermudensis_E00244:39.551664,(Ophidiidae_Onuxodon_parvibrachium_N06009:4.892188,Ophidiidae_Pyramodon_ventralis_N06013:4.892188)100:34.659476)99:7.72261)69:6.270833,((((Ophidiidae_Brotulotaenia_nigra_E00817:3.245412,Ophidiidae_Brotulotaenia_crassa_E00659:3.245412)100:25.686625,Ophidiidae_Lamprogrammus_niger_E00275:28.932037)95:12.673643,((Ophidiidae_Neobythites_gilli_E00612:36.784294,((Ophidiidae_Lepophidium_jeannae_E00621:17.96419,(Ophidiidae_Lepophidium_profundorum_E00248:15.851422,Ophidiidae_Lepophidium_brevibarbe_E00758:15.851422)37:2.112768)68:6.00596,(Ophidiidae_Genypterus_blacodes_E00241:22.550029,(Ophidiidae_Chilara_taylori_E00260:11.446586,(Ophidiidae_Ophidion_holbrookii_E01033:8.209621,(Ophidiidae_Ophidion_robinsi_E01007:4.256912,Ophidiidae_Ophidion_josephi_E00648:4.256912)99:3.952709)95:3.236965)100:11.103443)44:1.42012)100:12.814144)81:4.152298,Ophidiidae_Dicrolene_introniger_E00480:40.936592)25:0.669088)34:2.459439,Ophidiidae_Bassogigas_gillii_E00481:44.065118)32:9.479989)100:12.681643,(Ophidiidae_Brotula_multibarbata_E00883:17.760922,Ophidiidae_Brotula_barbata_E00629:17.760922)100:48.465828)100:9.17325)100:57.4)NA:12.2)100:1.463665)95:8.336335)100:6.583092)35:11.716908)100:9.7)100:9.5)100:19)86:3.554892)39:16.945108)100:18.8)100:23.2)100:9.5)100:39.2)100:27.6)100:32.5)100:42.2)92:37.6);
